# Supplementary material
Source: ML conference proceedings conference paper supplement (https://openreview.net/forum?id=WAid50QschI)
Supplement: supplementary_material [file attachment]

|   |   |   |   |   |
|---|---|---|---|---|
| 0 | 3 | 7 | 6 | 1 |
|---|---|---|---|---|

|   |   |   |   |   |
|---|---|---|---|---|
| 8 | 9 | 4 | 5 | / |
|---|---|---|---|---|
