# Supplementary material
Source: ML conference proceedings conference paper supplement (https://openreview.net/forum?id=WAid50QschI)
Supplement: supplementary_material [file attachment]

|   |   |   |   |   |
|---|---|---|---|---|
| 0 | 1 | 2 | 3 | 9 |
|---|---|---|---|---|

|   |   |   |   |   |
|---|---|---|---|---|
| 5 | 6 | 7 | 8 | 9 |
|---|---|---|---|---|
