# Supplementary material
Source: ML conference proceedings conference paper supplement (https://openreview.net/forum?id=WAid50QschI)

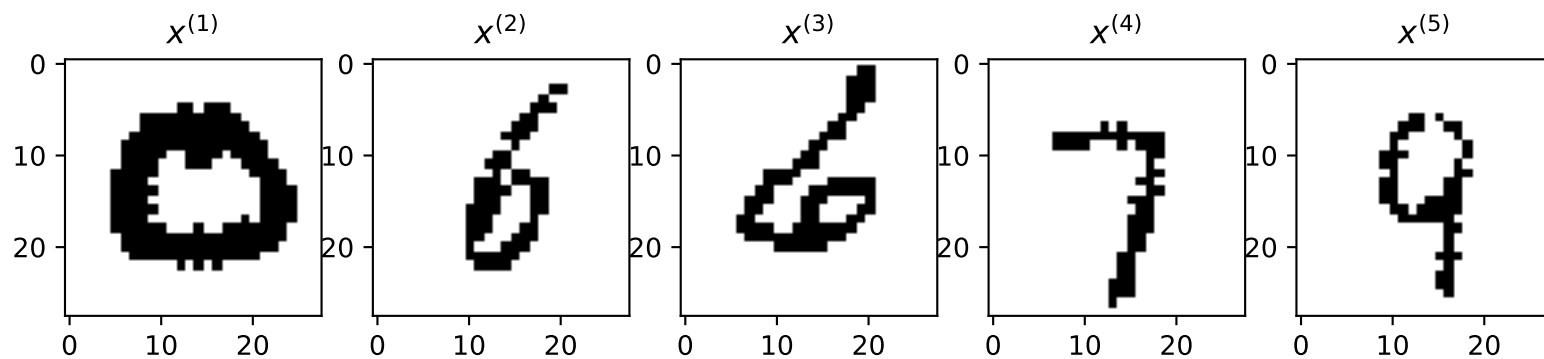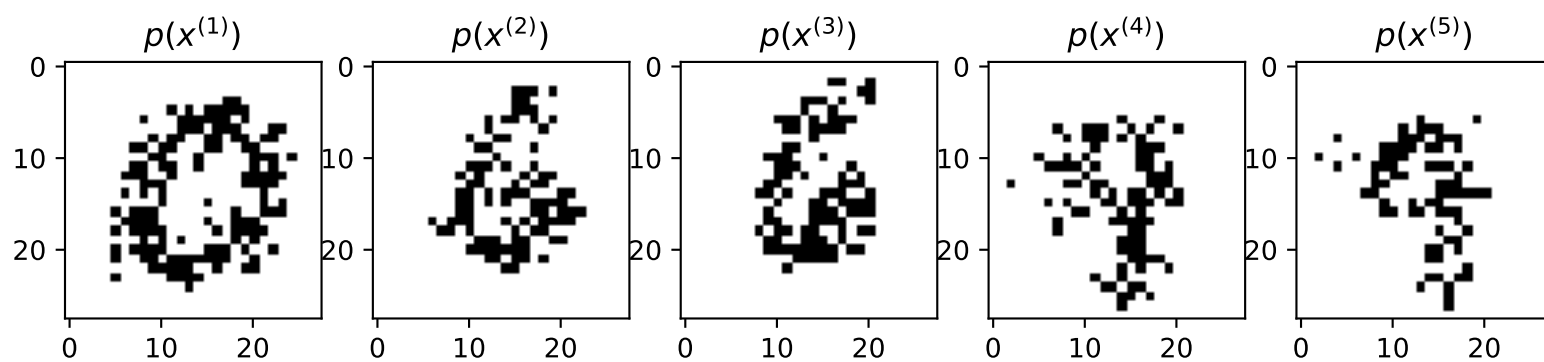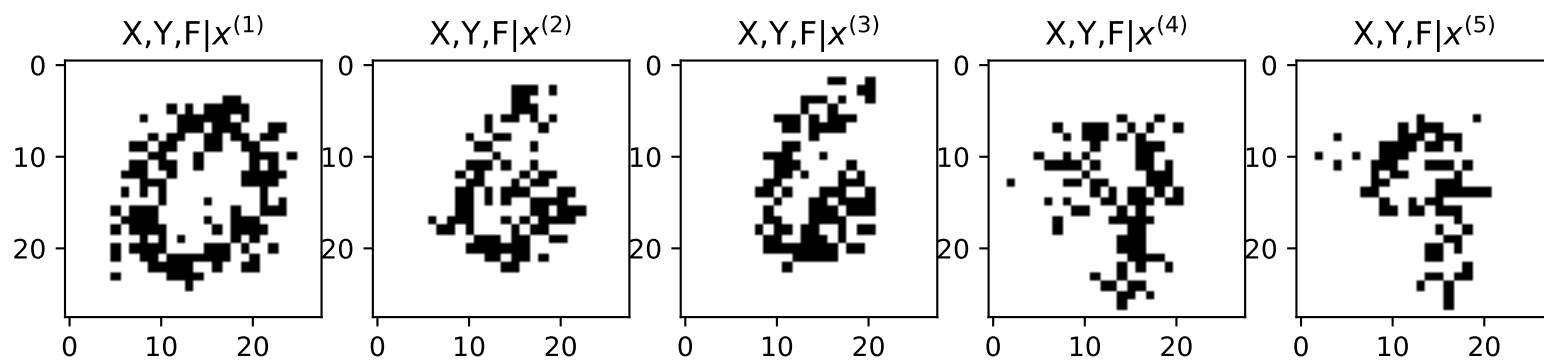

Supplement: supplementary_material [file attachment]

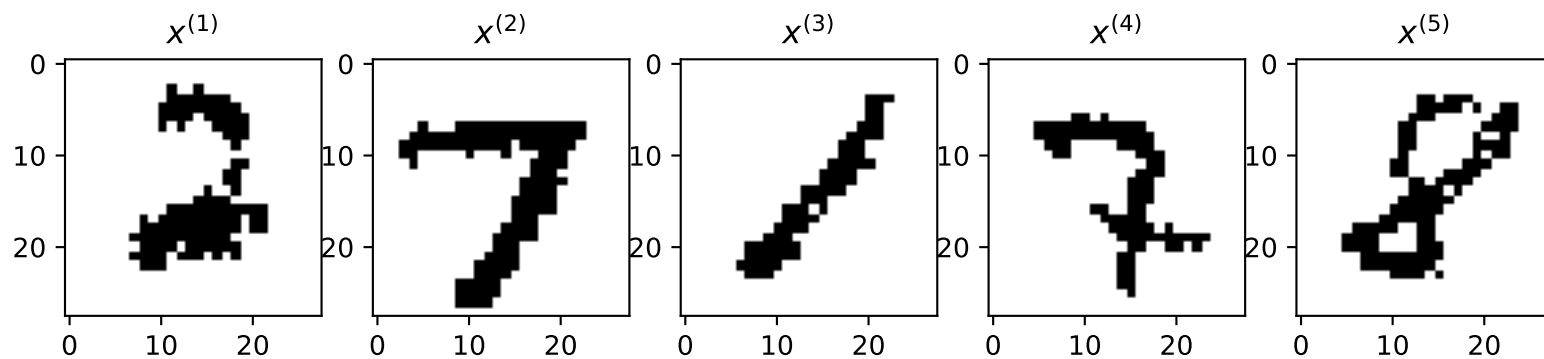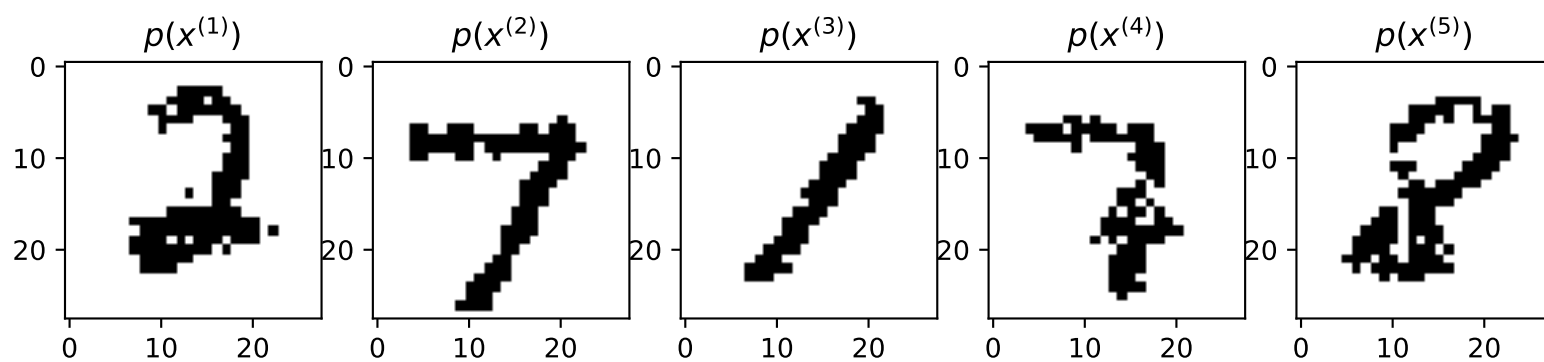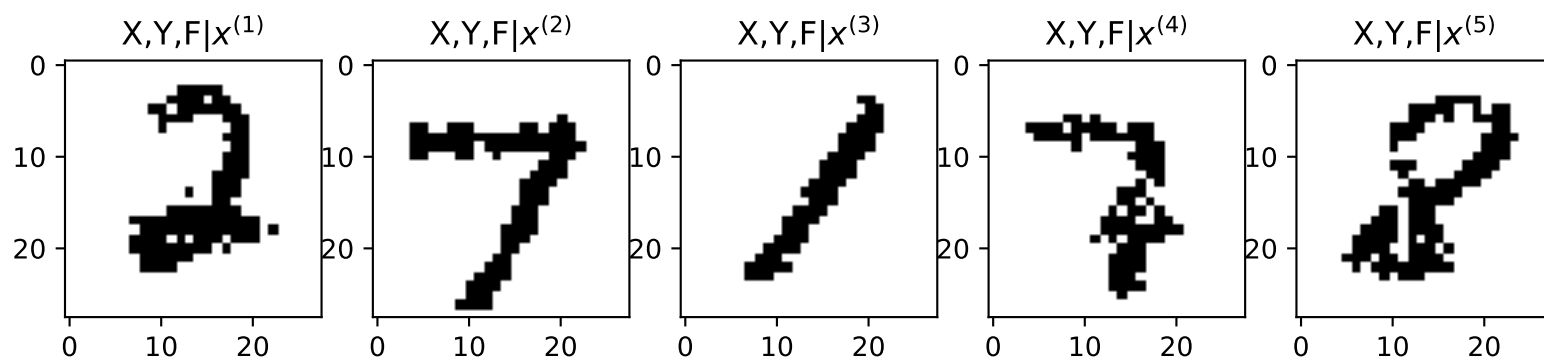

Supplement: supplementary_material [file attachment]

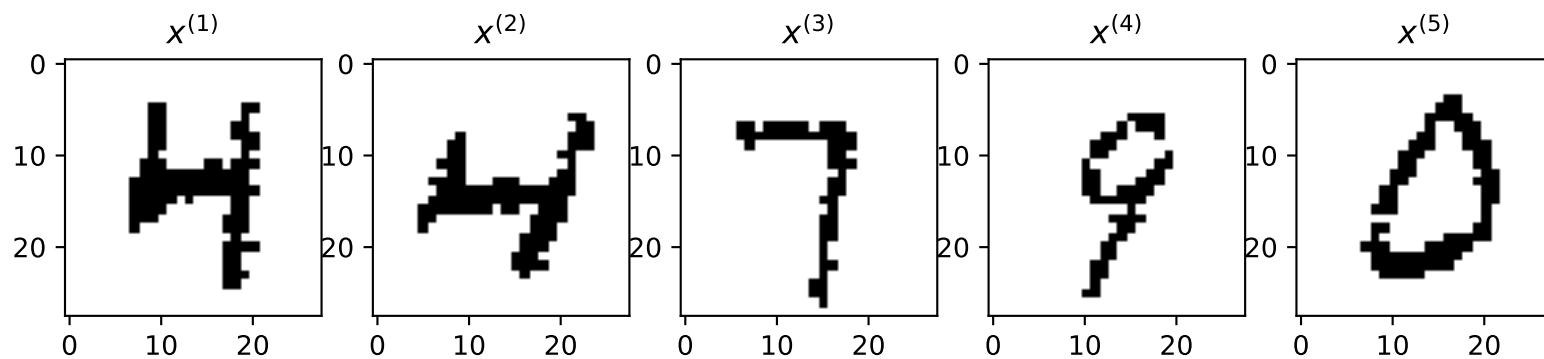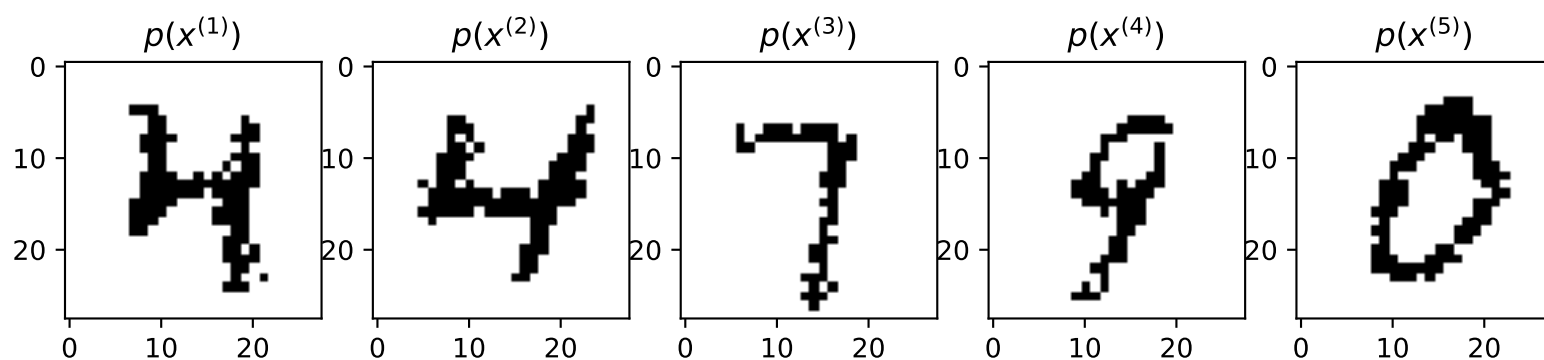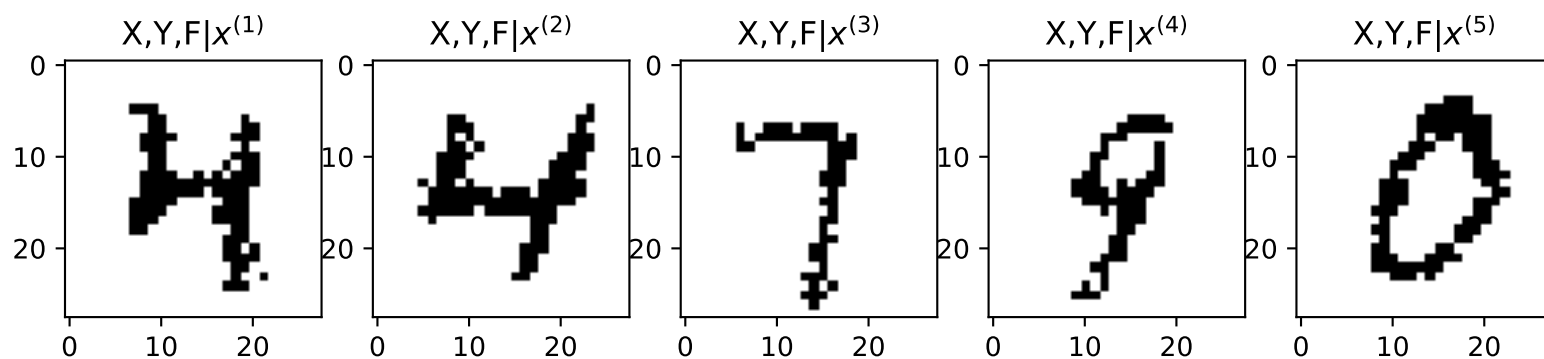

Supplement: supplementary_material [file attachment]

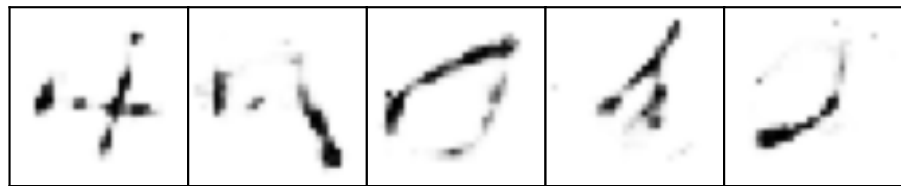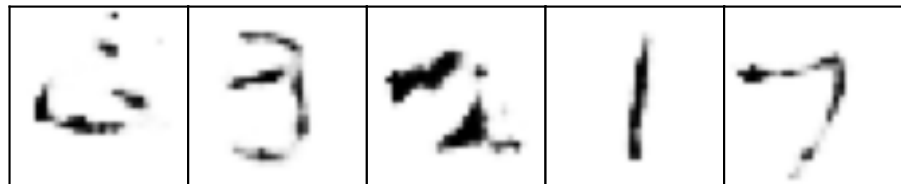

Supplement: supplementary_material [file attachment]

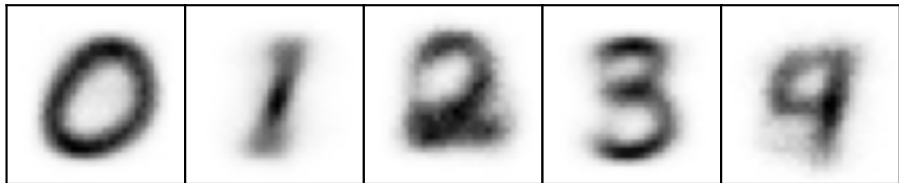

(0) 10.32

(1) 22.06

(2) 7.78

(3) 12.50

(4) 6.30

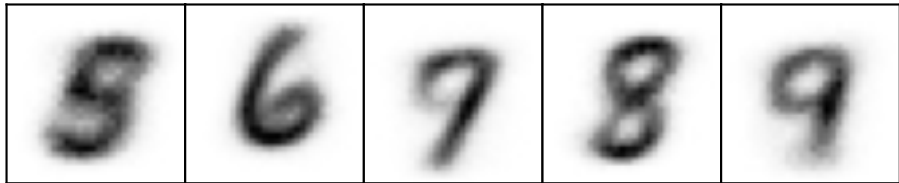

(5) 7.48

(6) 11.10

(7) 9.92

(8) 5.20

(9) 7.34

Supplement: supplementary_material [file attachment]

|   |                                                                                     |                                                                                     |                                                                                     |                                                                                      |                                                                                       |                                                                                       |                                                                                       |                                                                                       |                                                                                       |
|---|-------------------------------------------------------------------------------------|-------------------------------------------------------------------------------------|-------------------------------------------------------------------------------------|--------------------------------------------------------------------------------------|---------------------------------------------------------------------------------------|---------------------------------------------------------------------------------------|---------------------------------------------------------------------------------------|---------------------------------------------------------------------------------------|---------------------------------------------------------------------------------------|
| 0 |     |     |     |     |     |     |     |     |     |
| 1 |    |    |    |    |    |    |    |    |    |
| 2 |    |    |    |    |    |    |    |    |    |
| 3 |    |    |    |    |    |    |    |    |    |
| 4 |    |    |    |    |    |    |    |    |    |
| 5 |    |    |    |    |    |    |    |    |    |
| 6 |   |   |   |   |   |   |   |   |   |
| 7 |  |  |  |  |  |  |  |  |  |
| 8 |  |  |  |  |  |  |  |  |  |
| 9 |  |  |  |  |  |  |  |  |  |

Supplement: supplementary_material [file attachment]

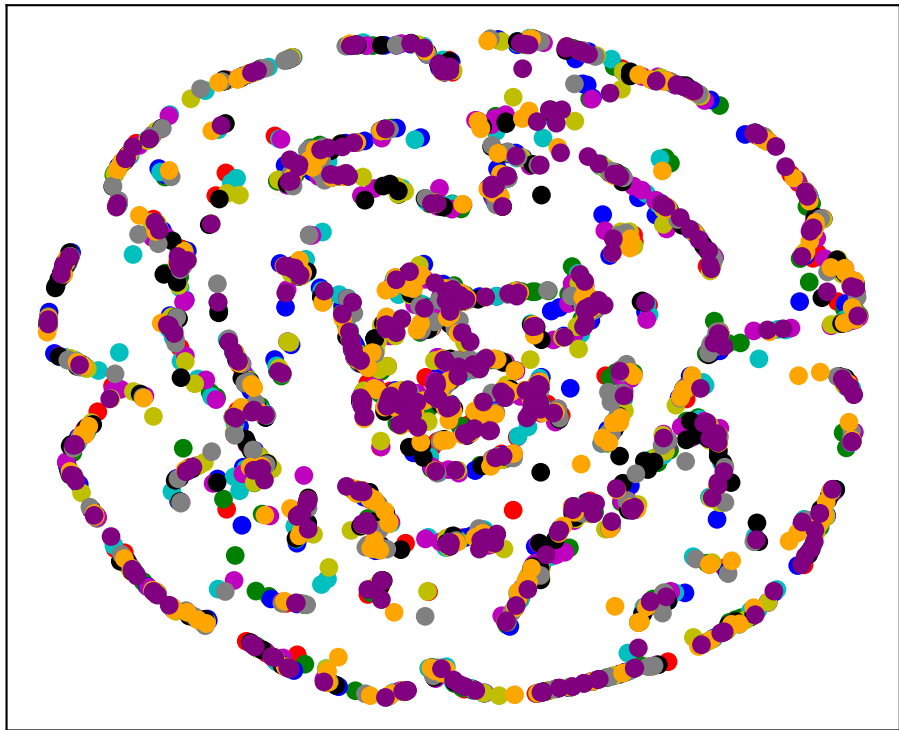

Supplement: supplementary_material [file attachment]

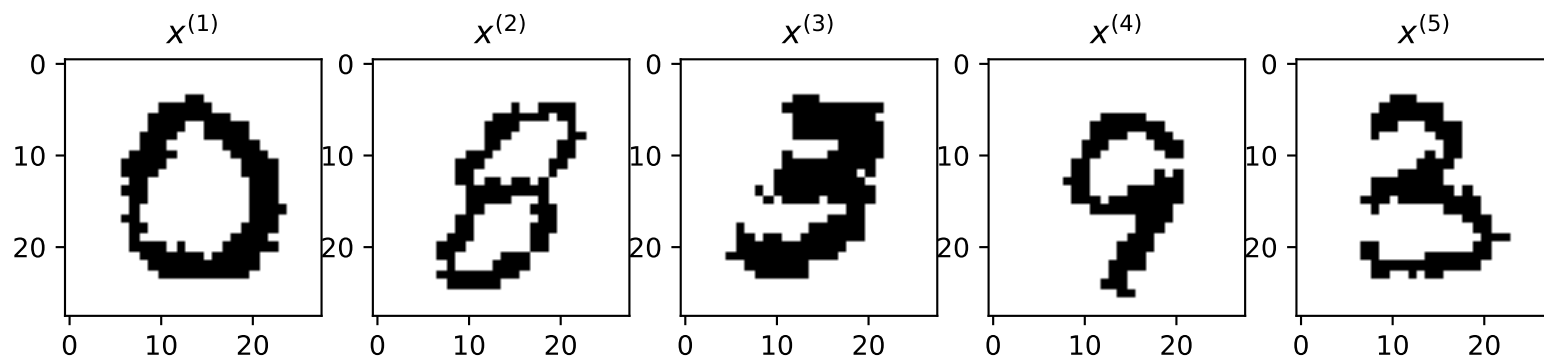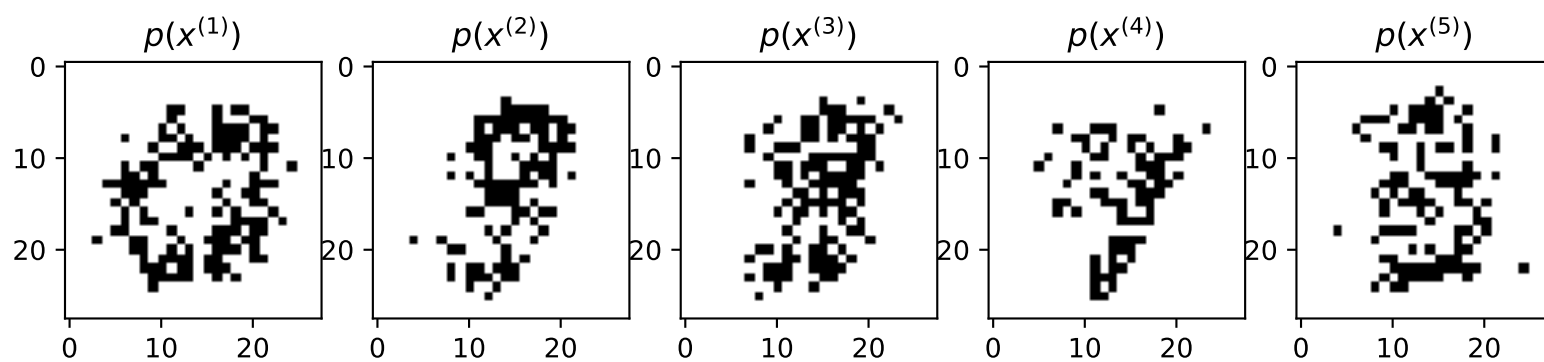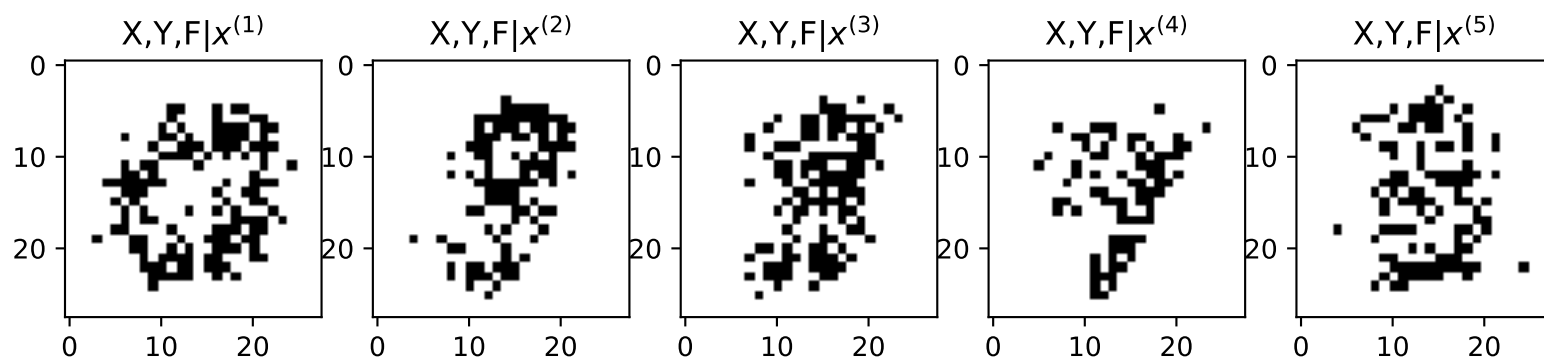

Supplement: supplementary_material [file attachment]

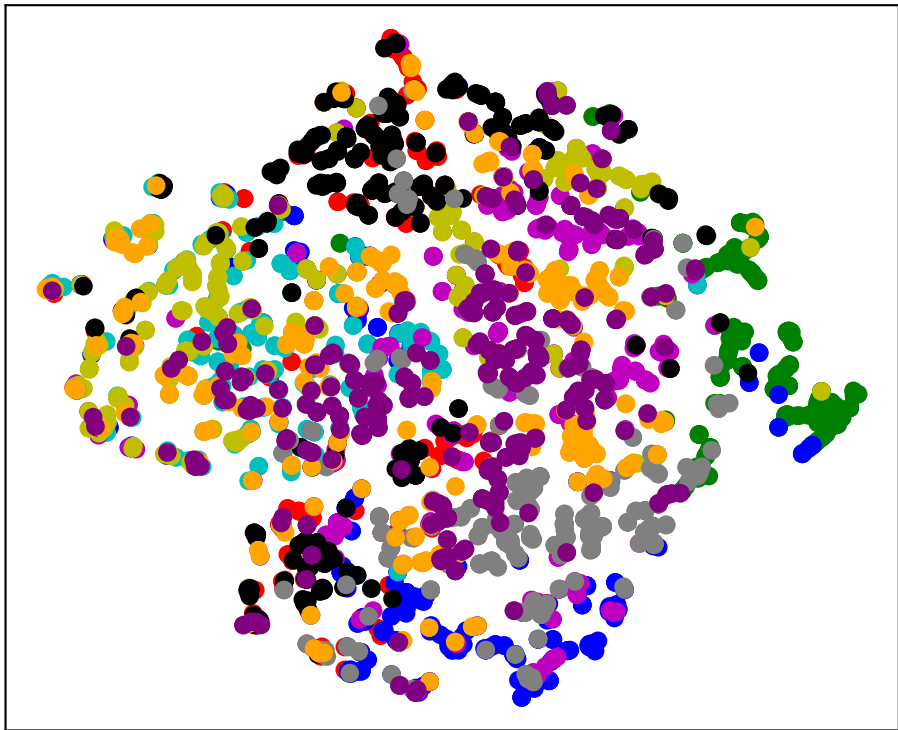

Supplement: supplementary_material [file attachment]

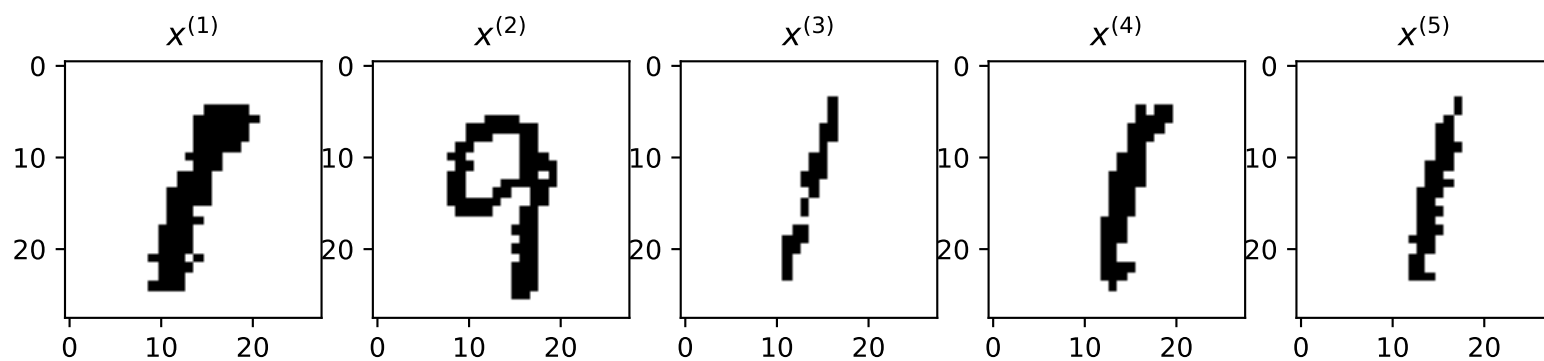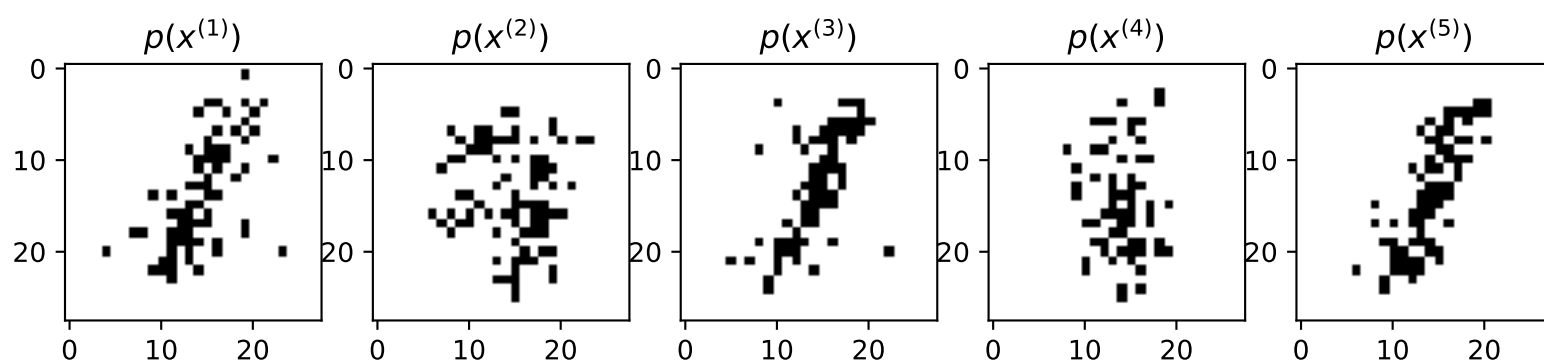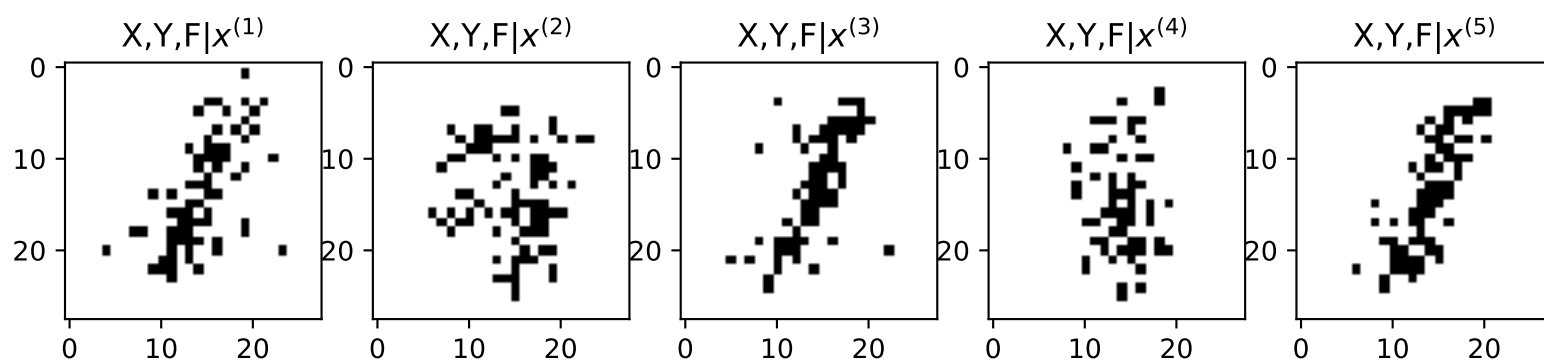

Supplement: supplementary_material [file attachment]

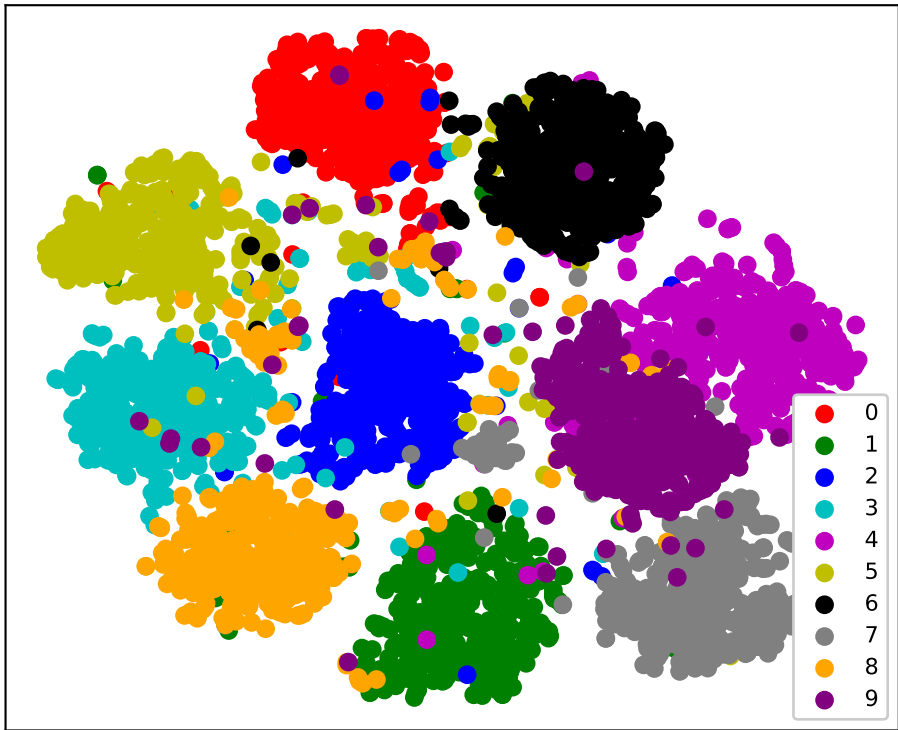

Supplement: supplementary_material [file attachment]

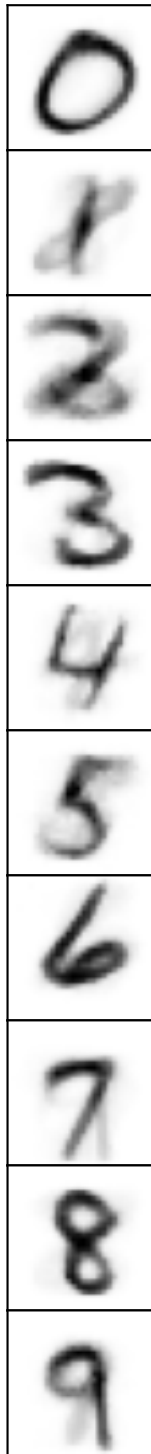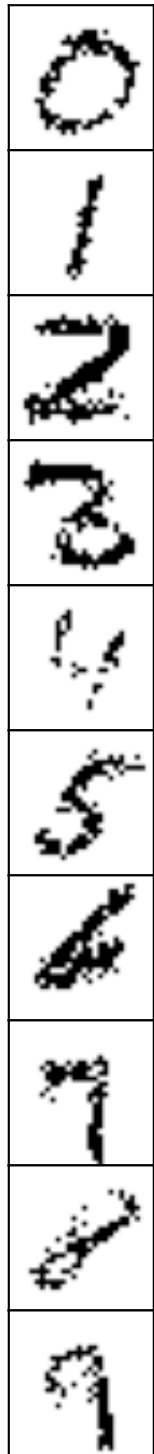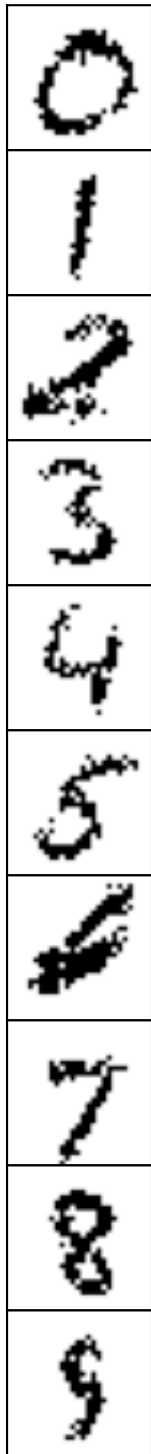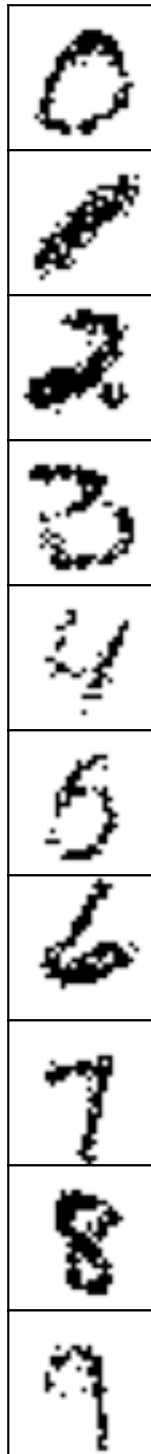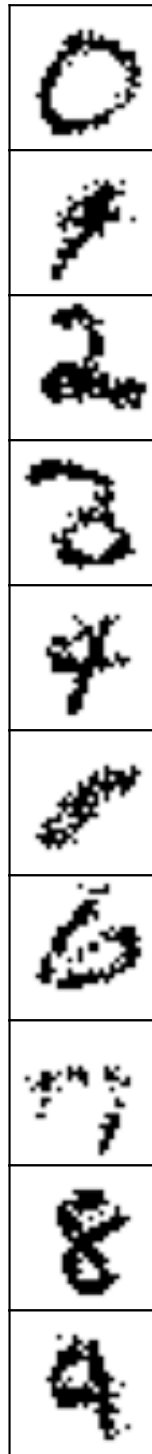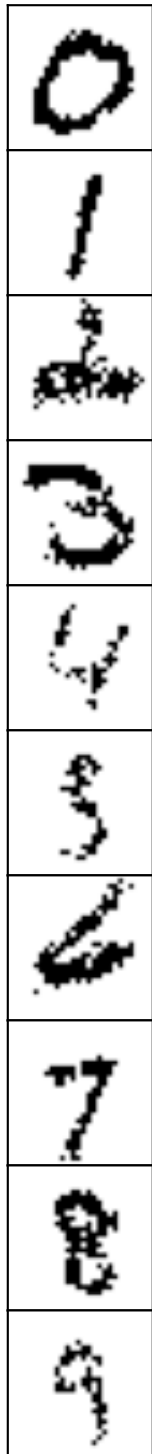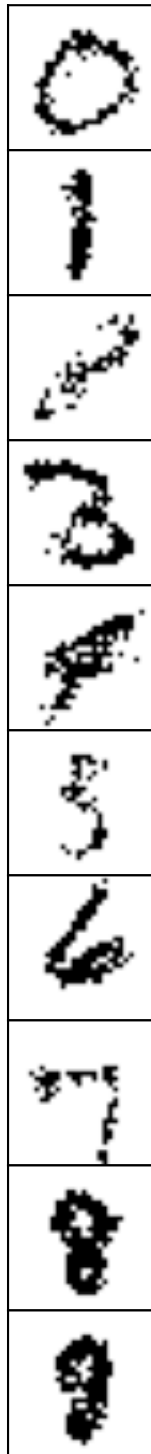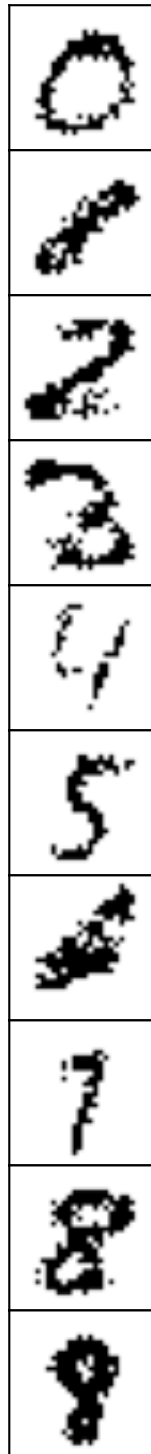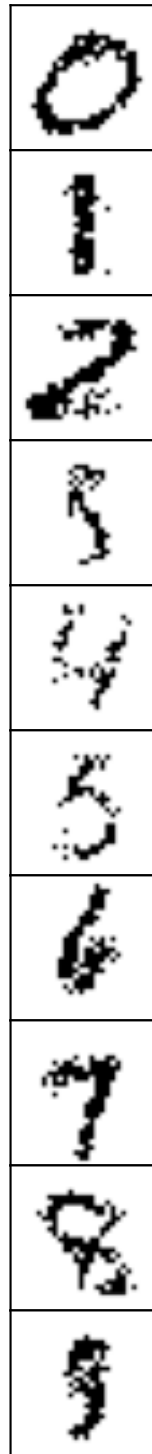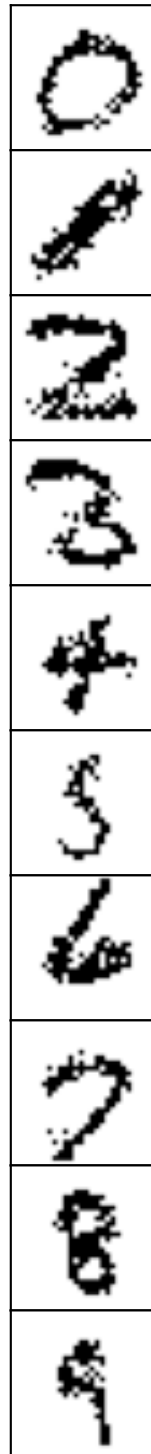

Supplement: supplementary_material [file attachment]



Supplement: supplementary_material [file attachment]

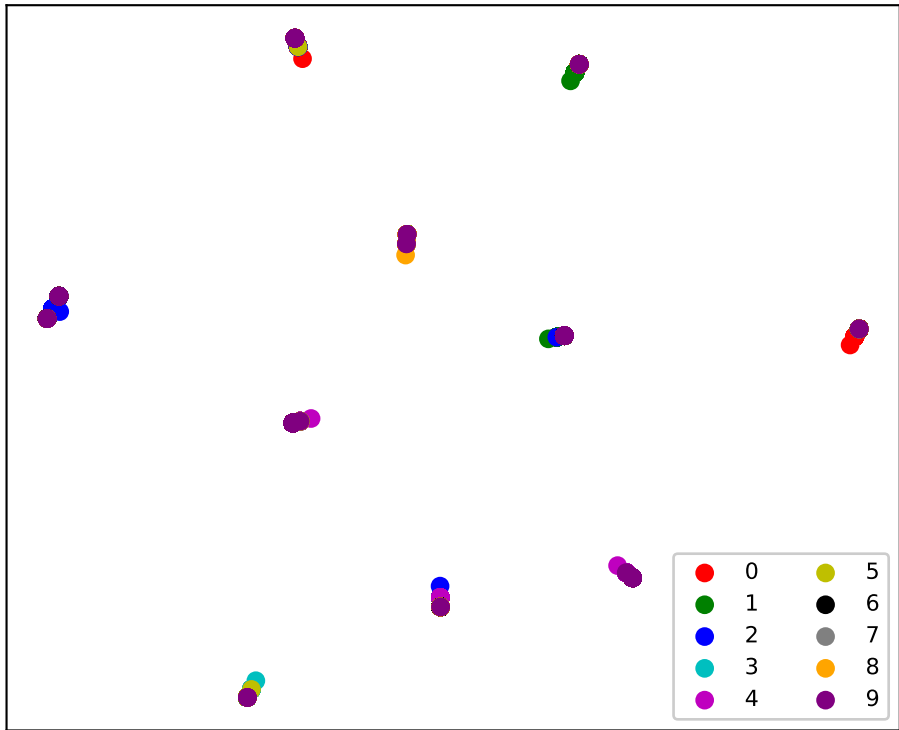

Supplement: supplementary_material [file attachment]

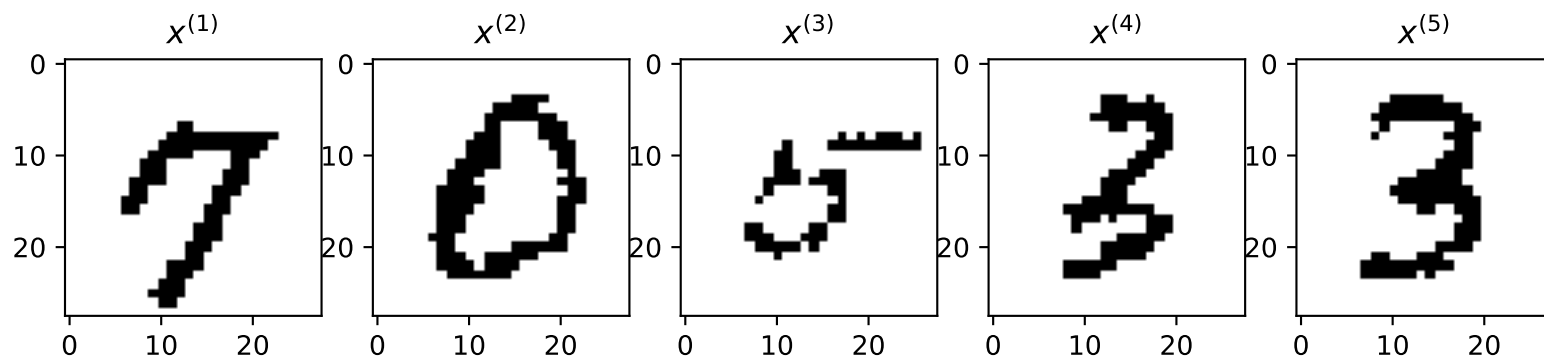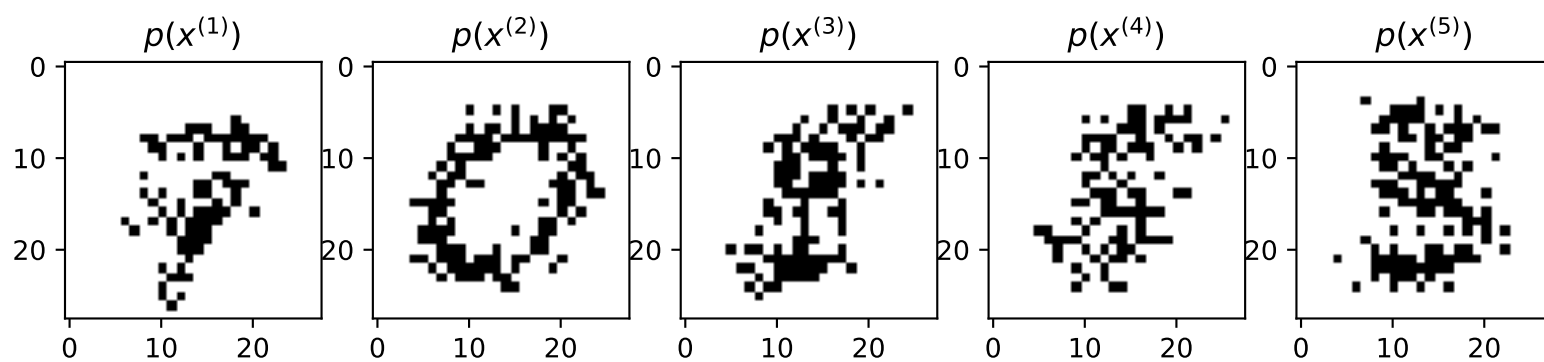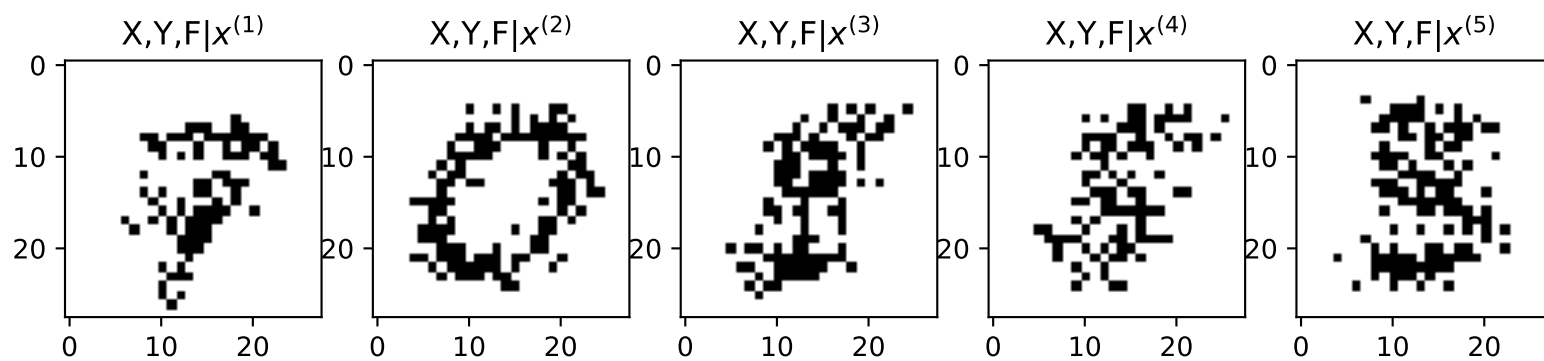

Supplement: supplementary_material [file attachment]

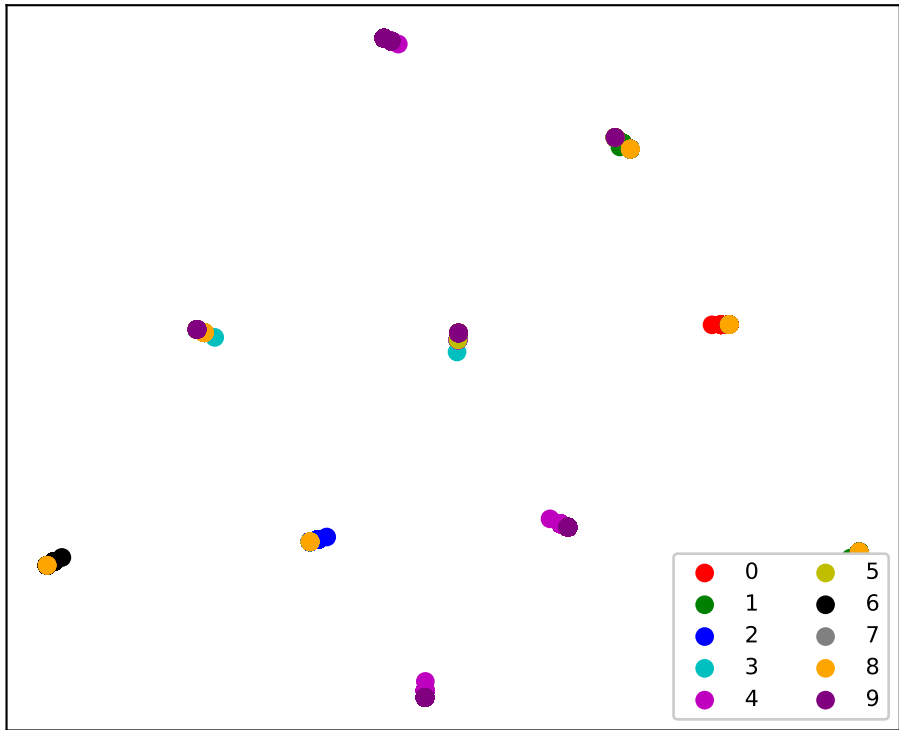

Supplement: supplementary_material [file attachment]

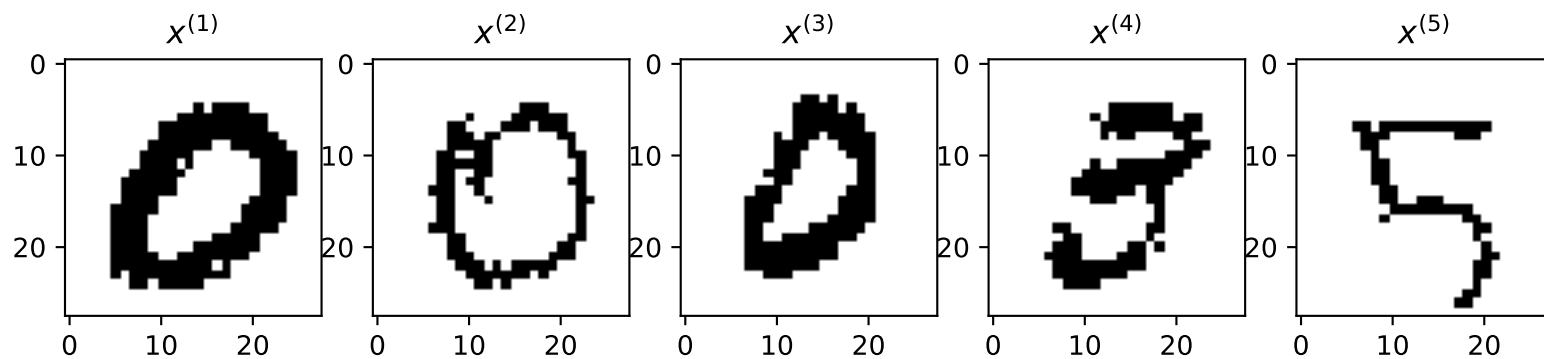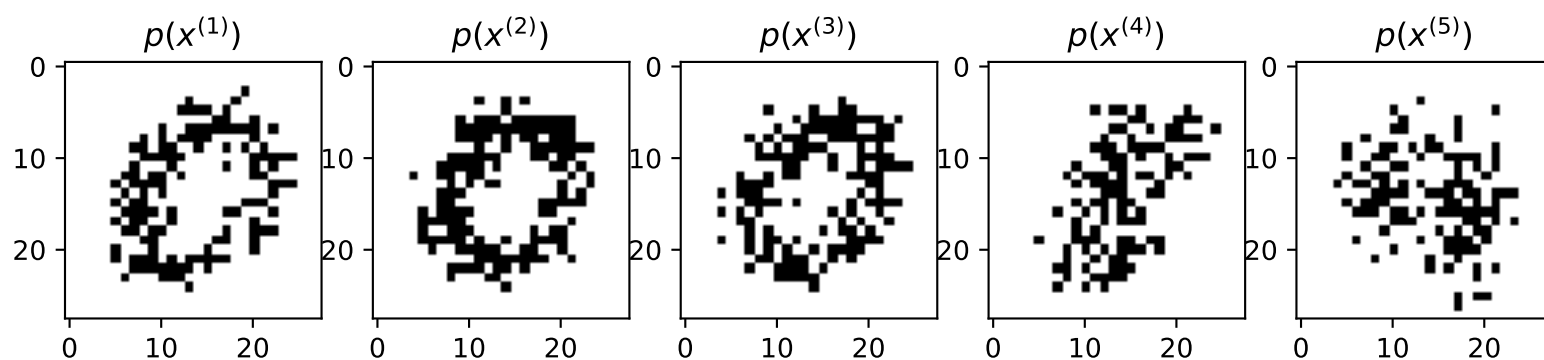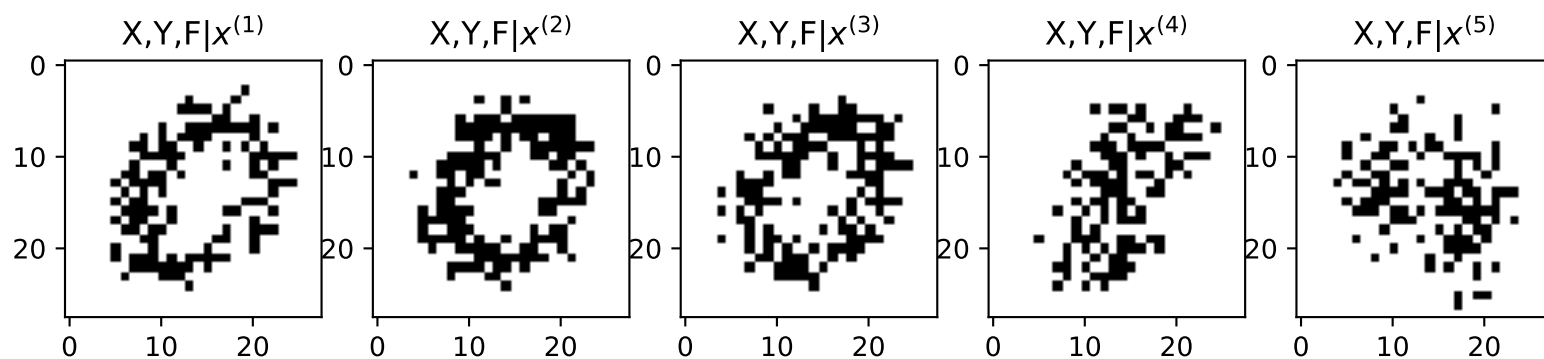

Supplement: supplementary_material [file attachment]

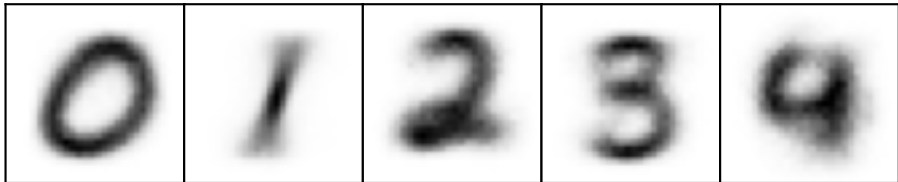

(0) 10.18

(1) 21.32

(2) 9.40

(3) 8.86

(4) 10.16

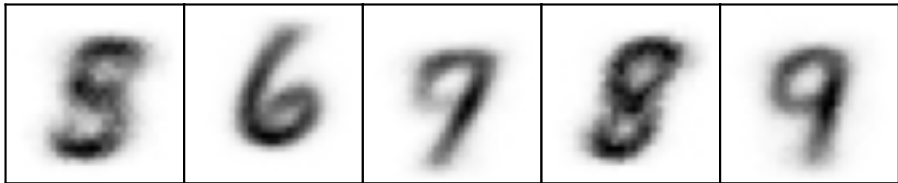

(5) 4.44

(6) 10.68

(7) 10.82

(8) 3.30

(9) 10.84

Supplement: supplementary_material [file attachment]

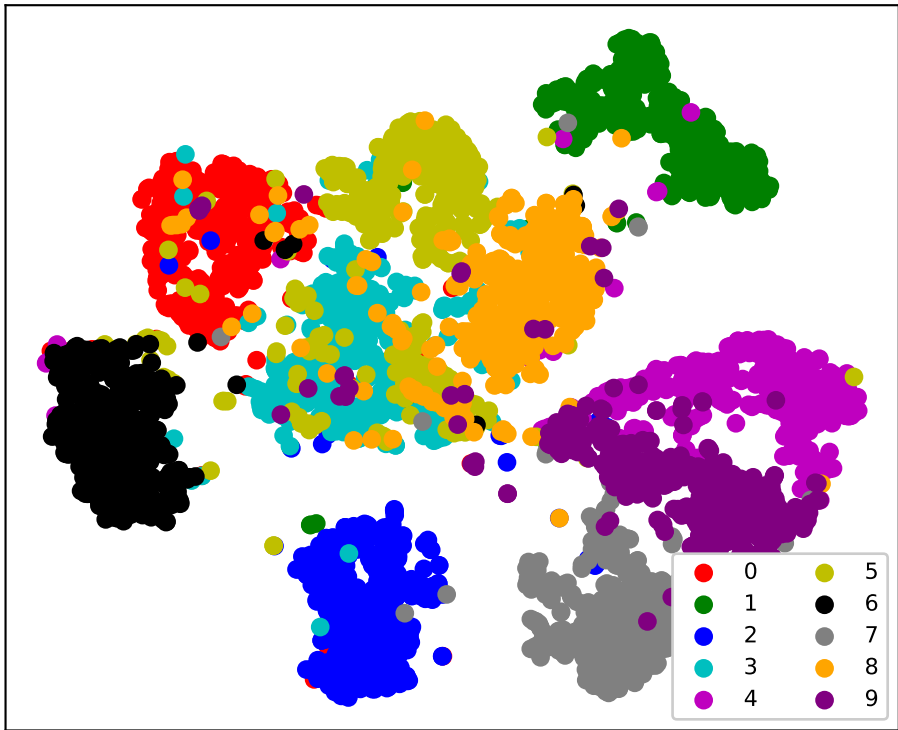

Supplement: supplementary_material [file attachment]

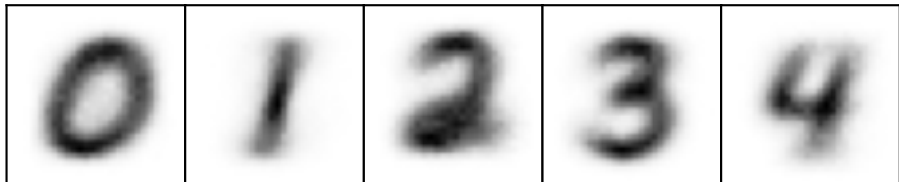

(0) 9.78

(1) 17.18

(2) 7.50

(3) 11.32

(4) 8.44

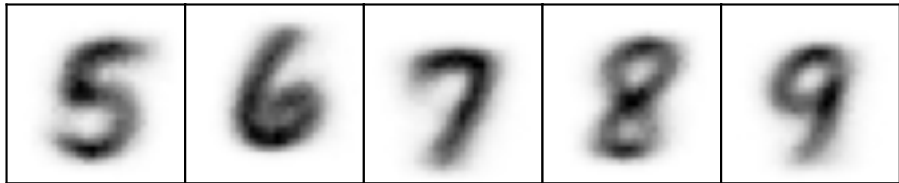

(5) 7.84

(6) 8.86

(7) 11.42

(8) 6.30

(9) 11.36

Supplement: supplementary_material [file attachment]

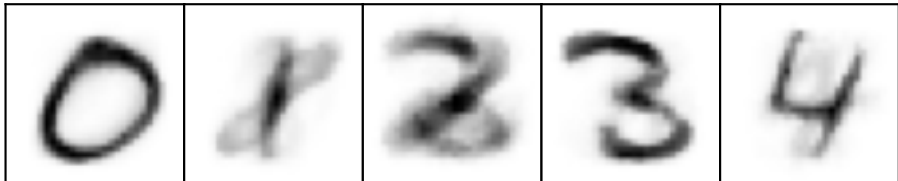

(0) 17.12

(1) 17.68

(2) 4.54

(3) 7.54

(4) 6.90

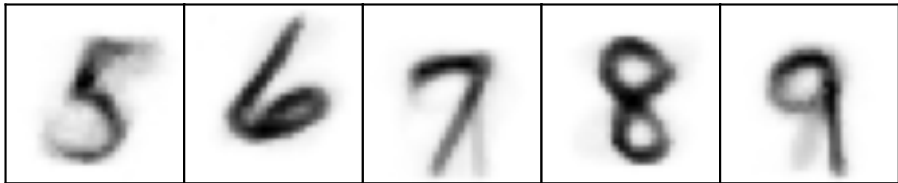

(5) 6.08

(6) 7.64

(7) 16.36

(8) 10.16

(9) 5.98

Supplement: supplementary_material [file attachment]

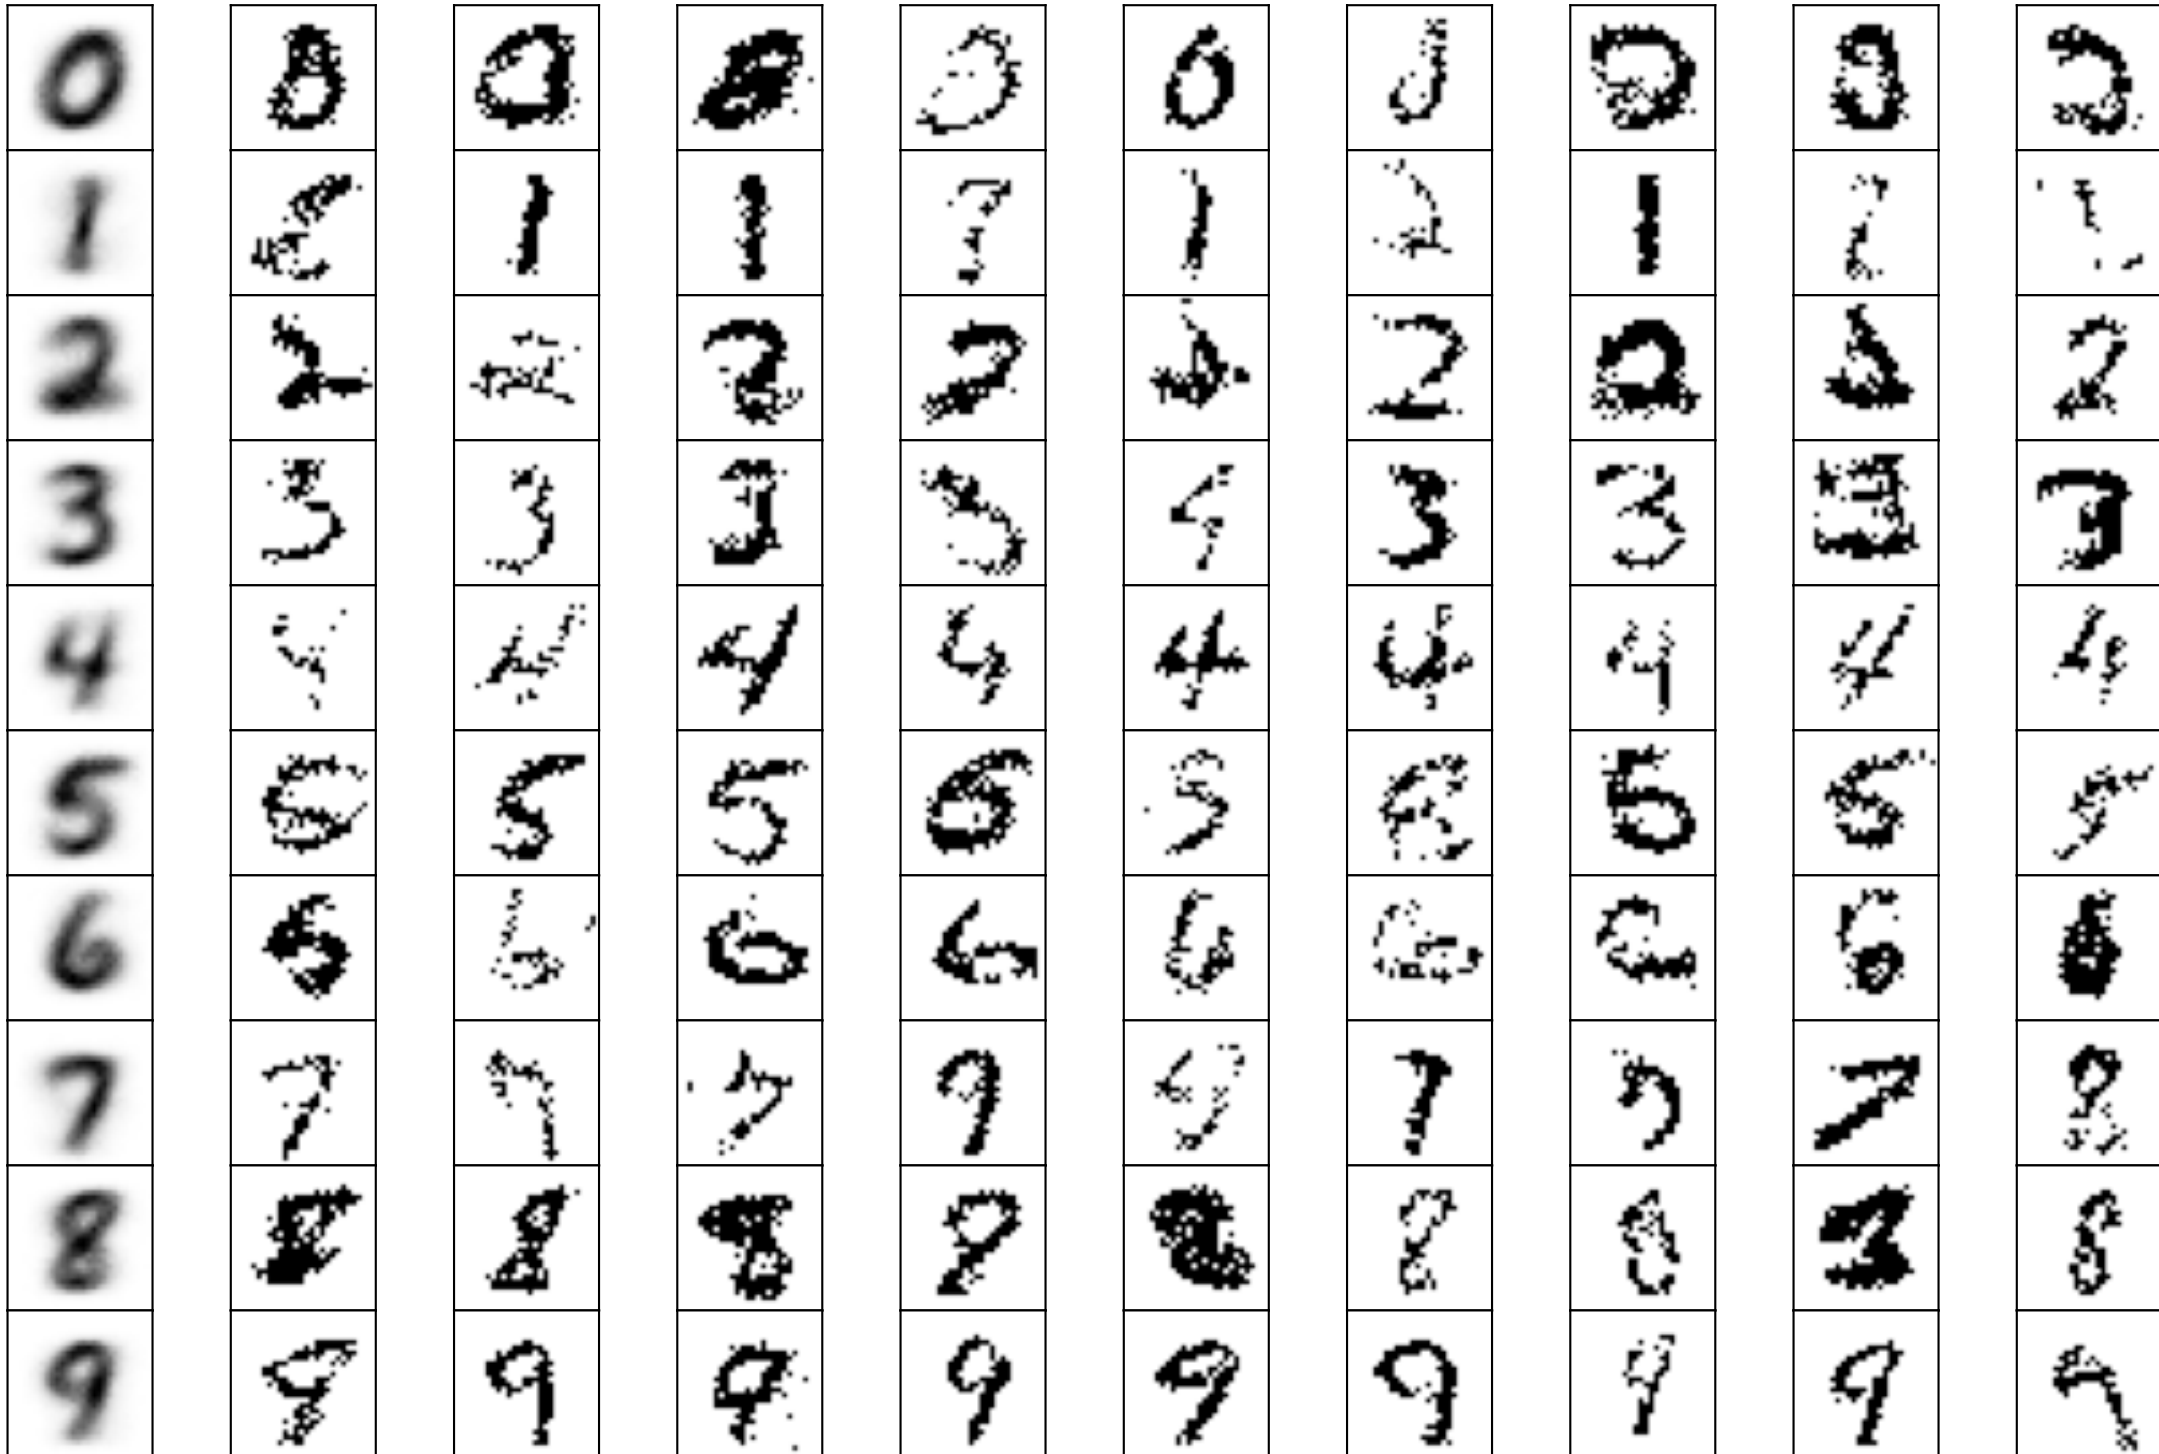

Supplement: supplementary_material [file attachment]

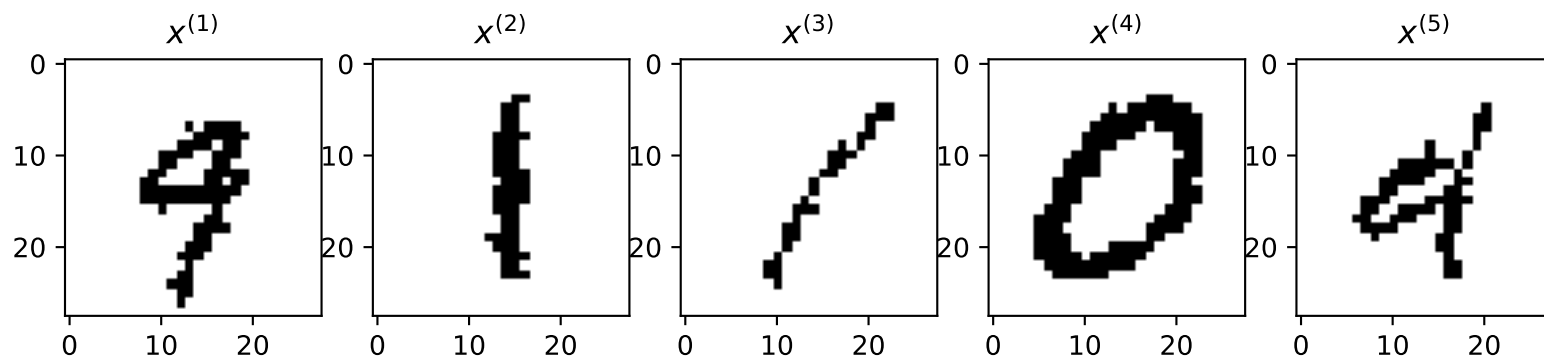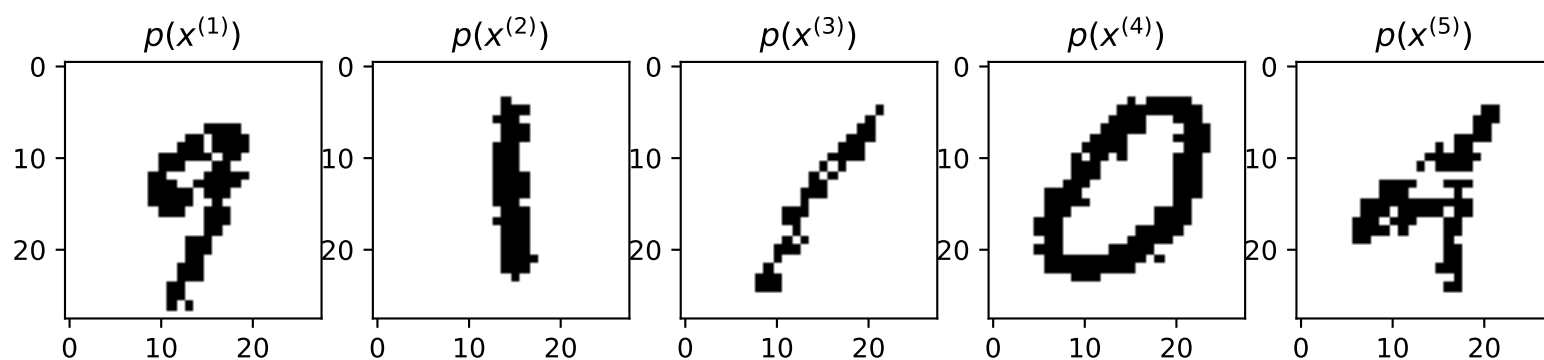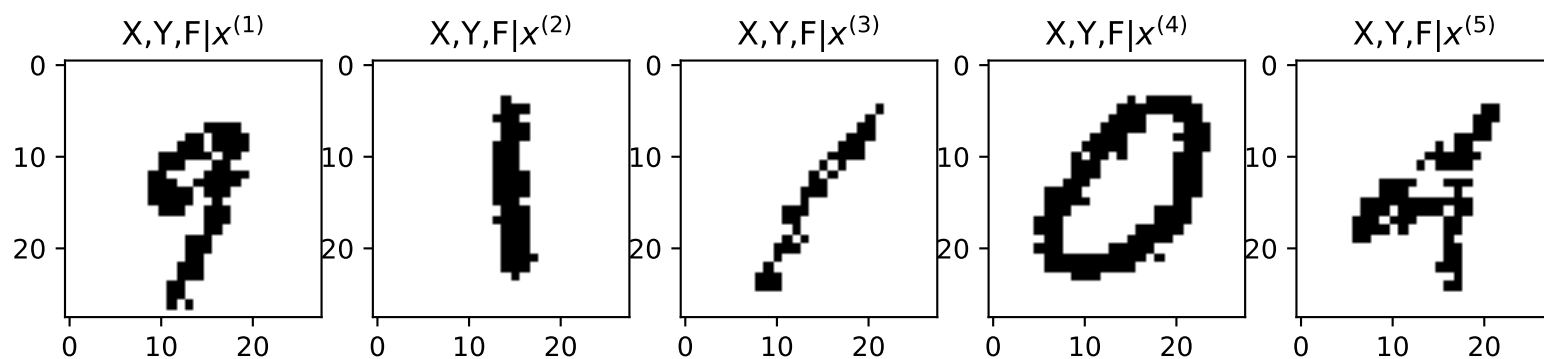

Supplement: supplementary_material [file attachment]

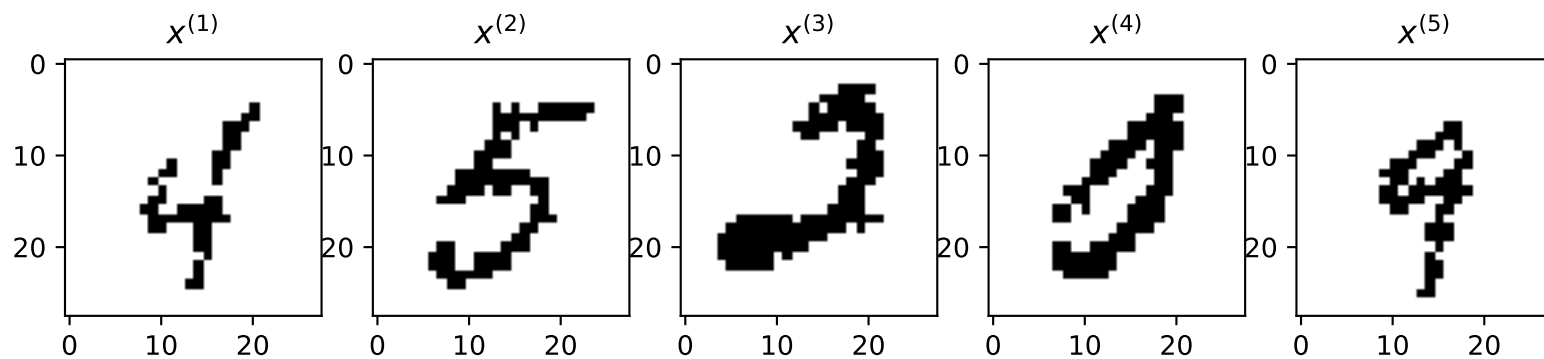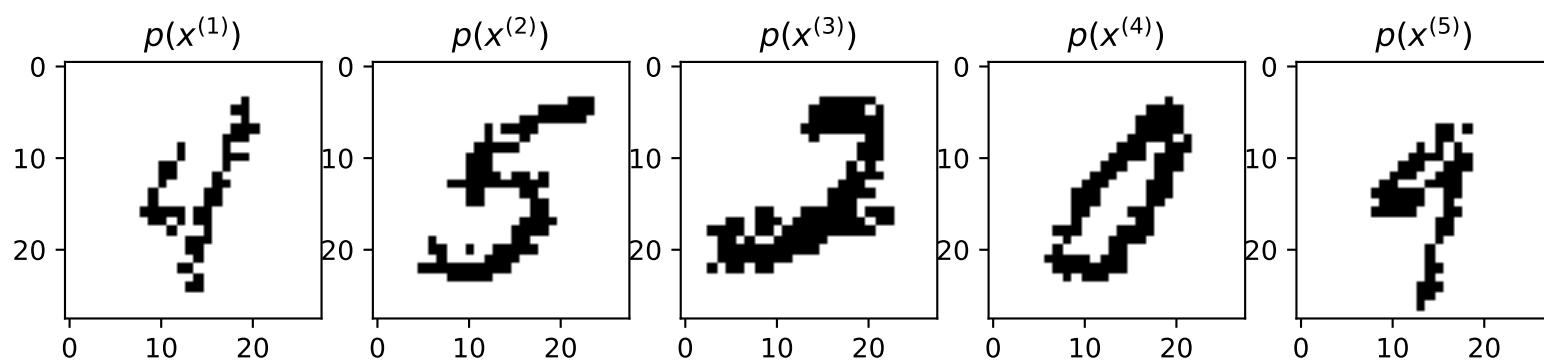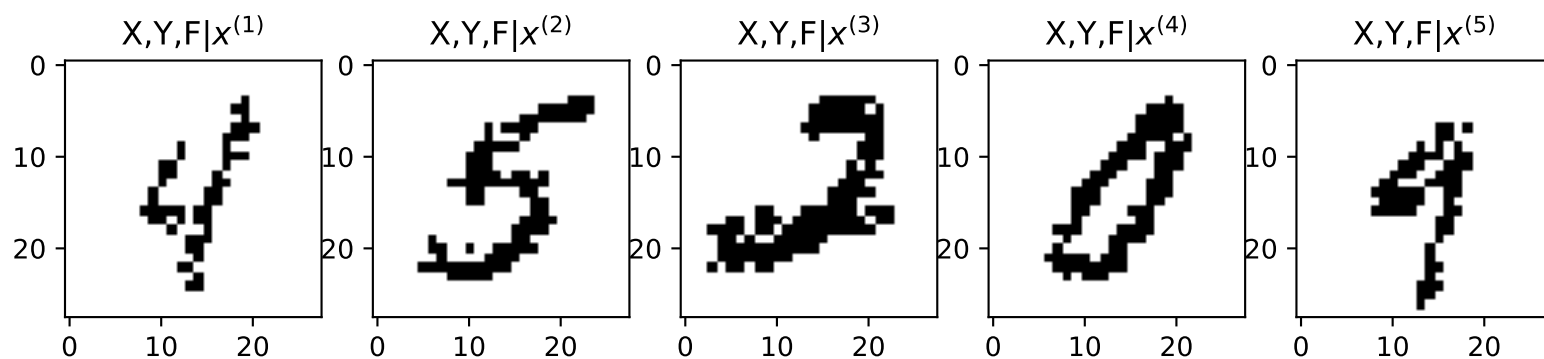

Supplement: supplementary_material [file attachment]

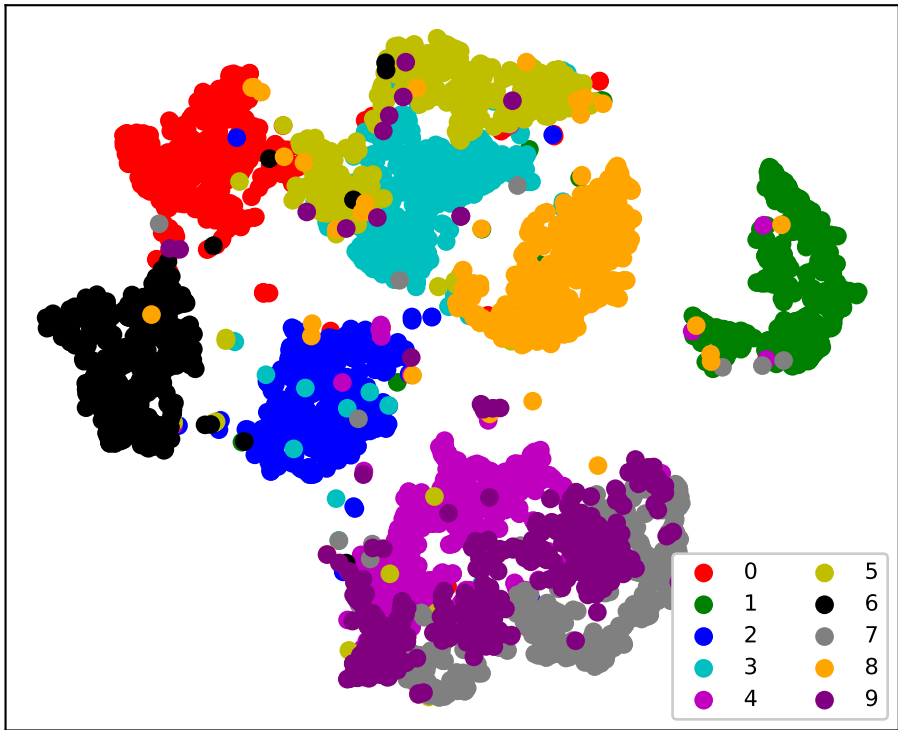

Supplement: supplementary_material [file attachment]

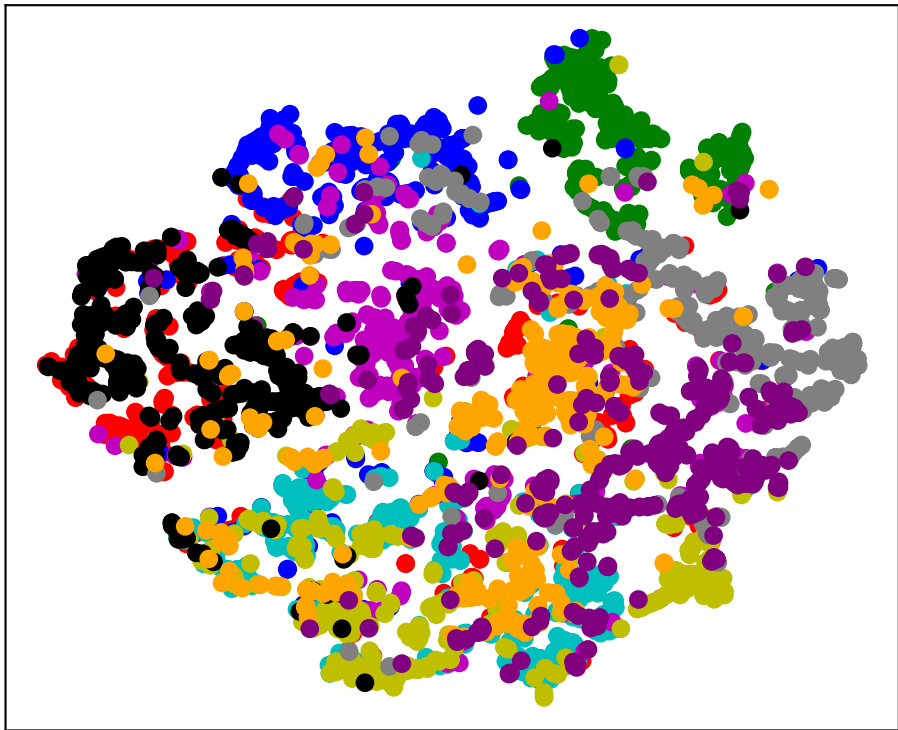

Supplement: supplementary_material [file attachment]

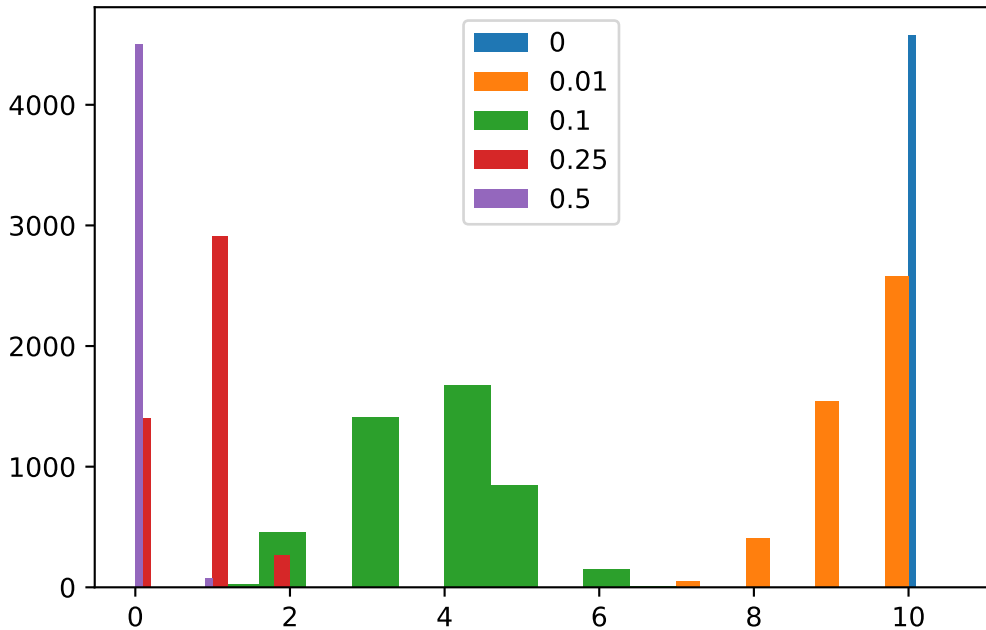

Supplement: supplementary_material [file attachment]

|   |                                                                                     |                                                                                     |                                                                                     |                                                                                      |                                                                                       |                                                                                       |                                                                                       |                                                                                       |                                                                                       |
|---|-------------------------------------------------------------------------------------|-------------------------------------------------------------------------------------|-------------------------------------------------------------------------------------|--------------------------------------------------------------------------------------|---------------------------------------------------------------------------------------|---------------------------------------------------------------------------------------|---------------------------------------------------------------------------------------|---------------------------------------------------------------------------------------|---------------------------------------------------------------------------------------|
| 0 |     |     |     |     |     |     |     |     |     |
| 1 |    |    |    |    |    |    |    |    |    |
| 2 |    |    |    |    |    |    |    |    |    |
| 3 |    |    |    |    |    |    |    |    |    |
| 4 |    |    |    |    |    |    |    |    |    |
| 5 |    |    |    |    |    |    |    |    |    |
| 6 |   |   |   |   |   |   |   |   |   |
| 7 |  |  |  |  |  |  |  |  |  |
| 8 |  |  |  |  |  |  |  |  |  |
| 9 |  |  |  |  |  |  |  |  |  |

Supplement: supplementary_material [file attachment]

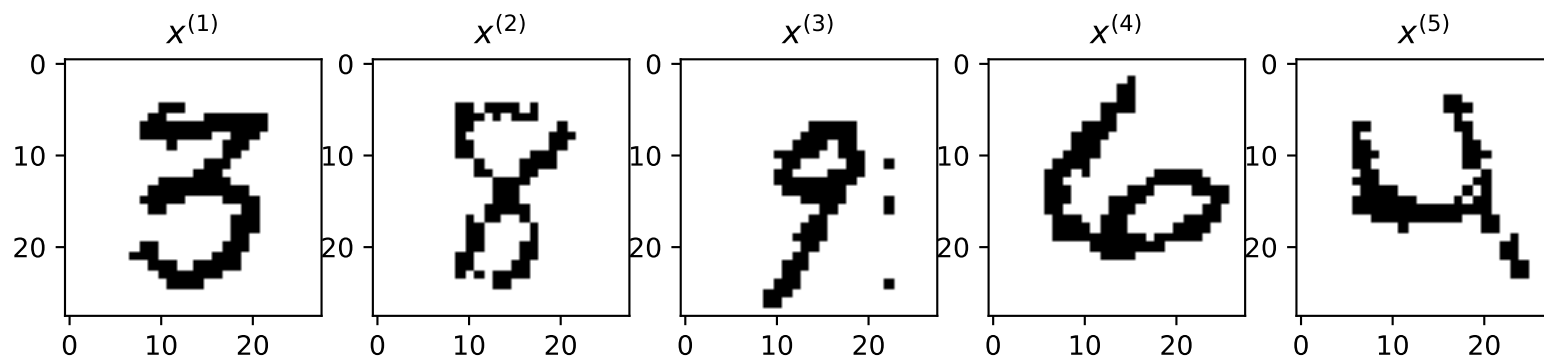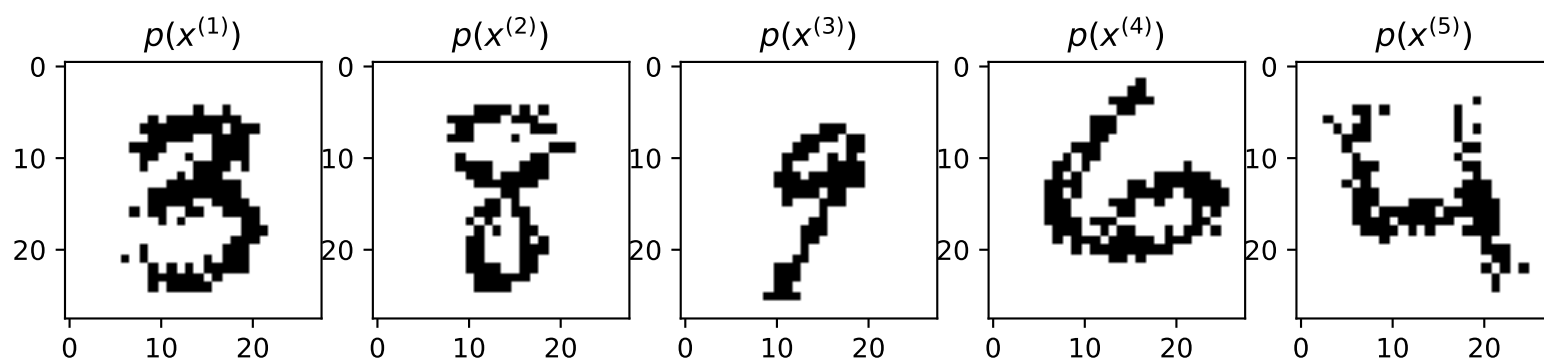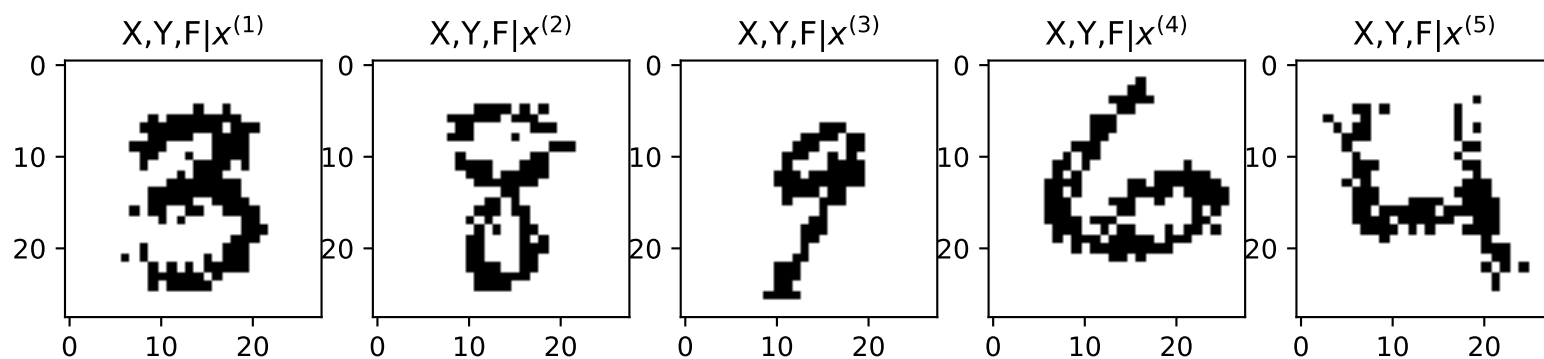

Supplement: supplementary_material [file attachment]

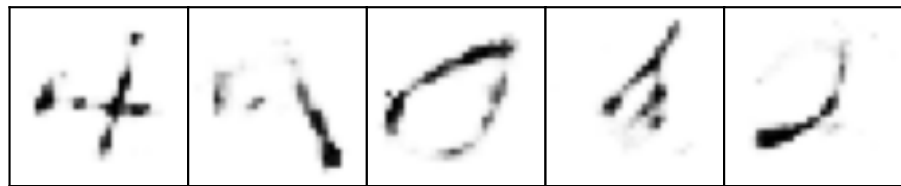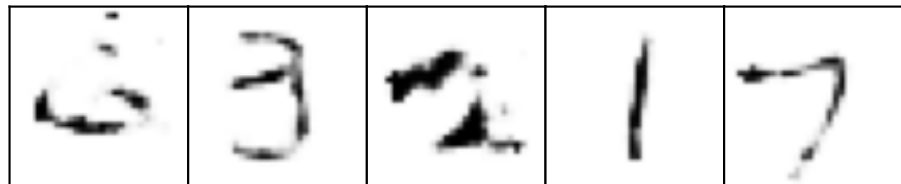

Supplement: supplementary_material [file attachment]

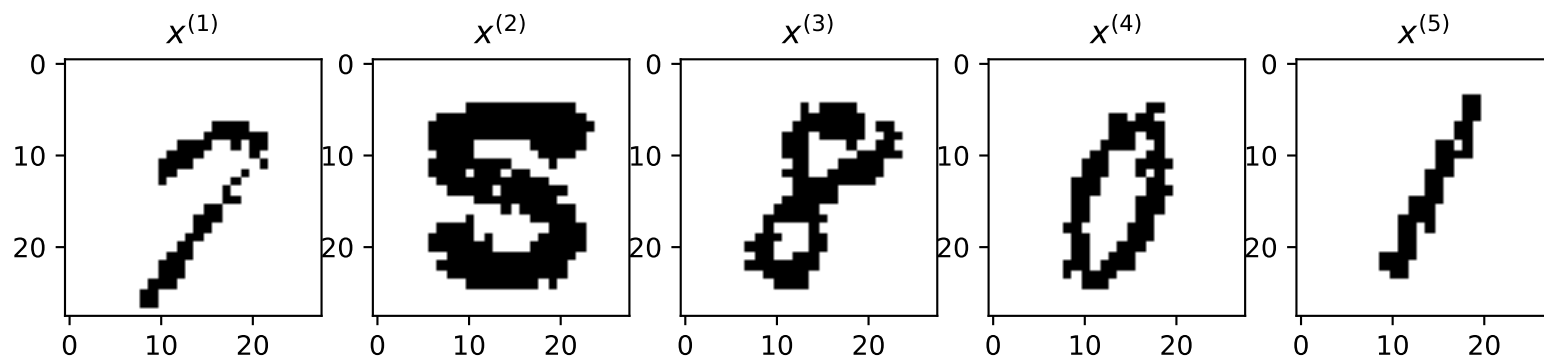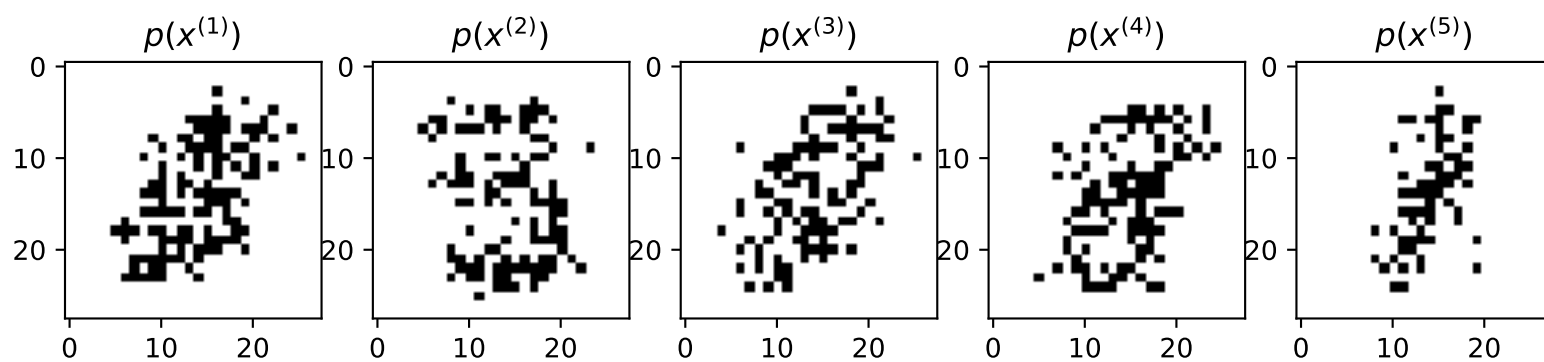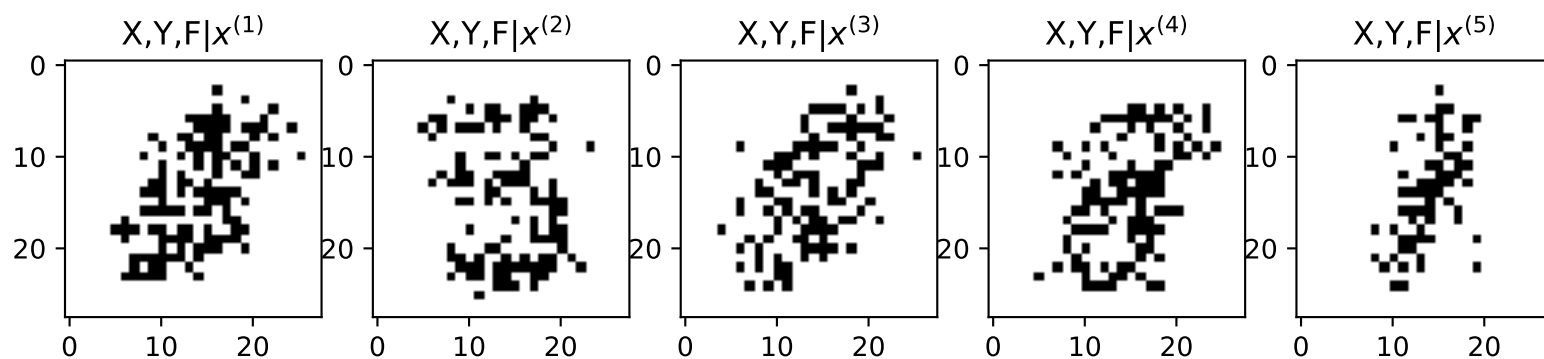

Supplement: supplementary_material [file attachment]

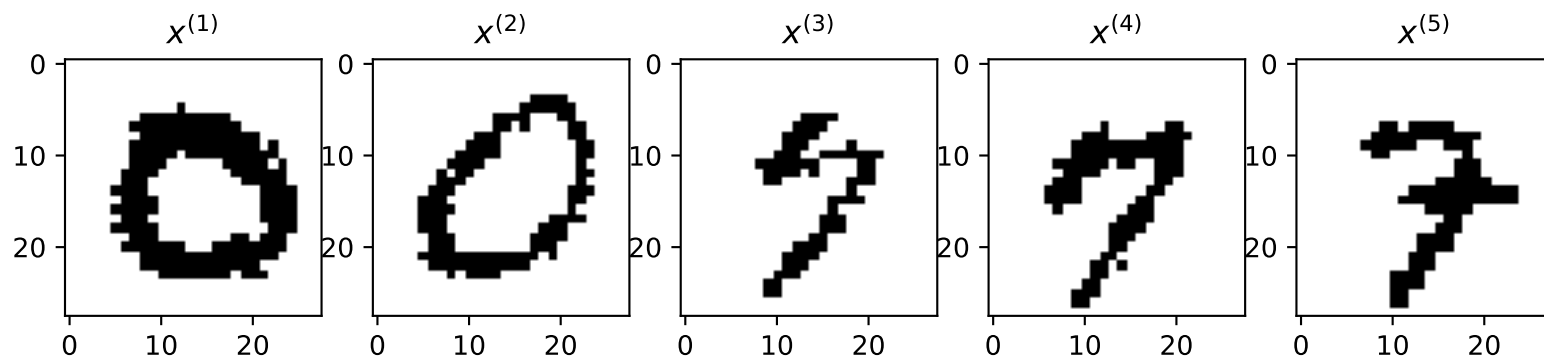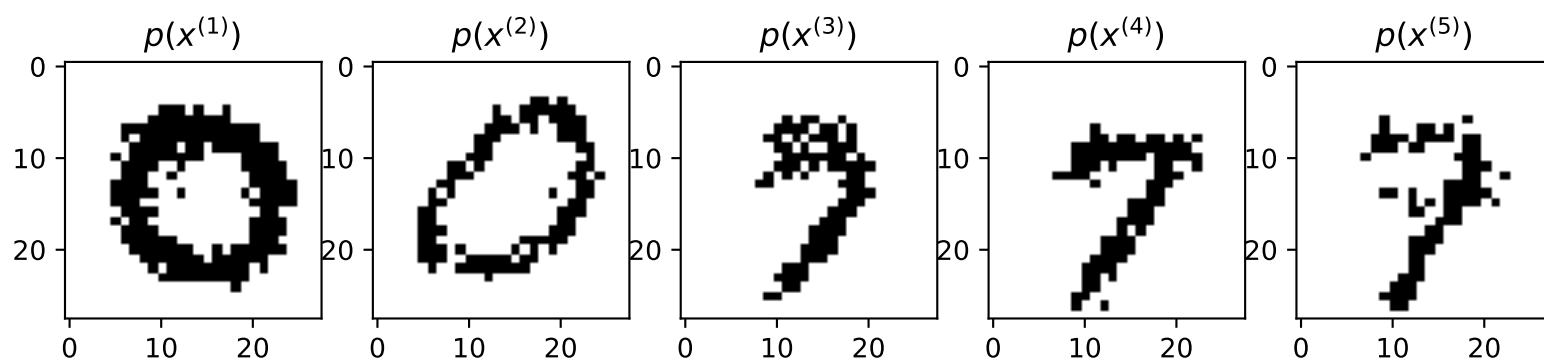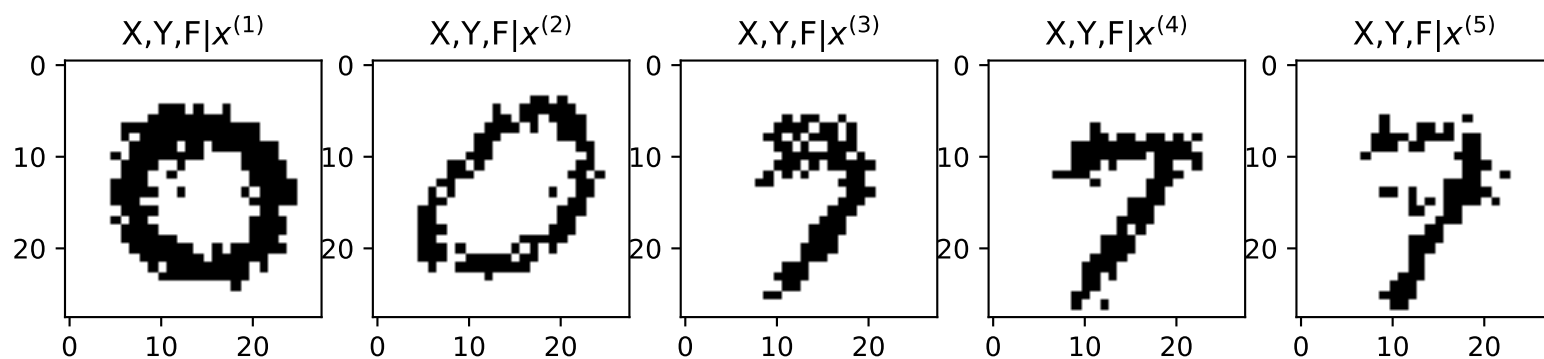

Supplement: supplementary_material [file attachment]

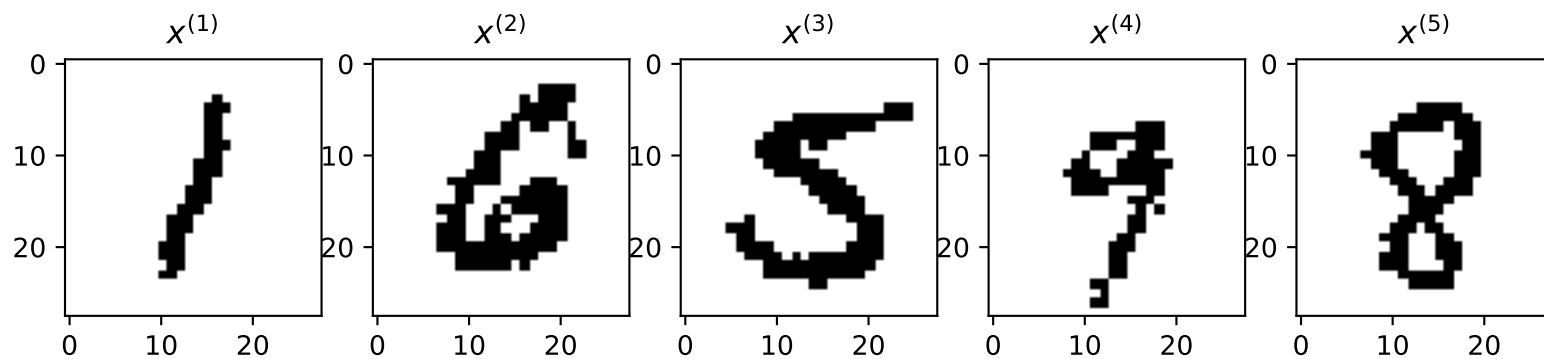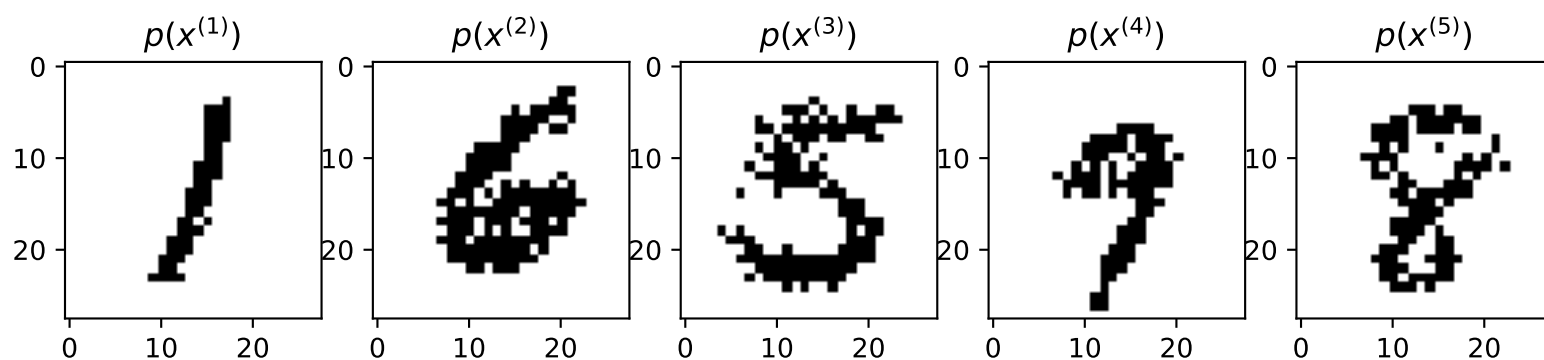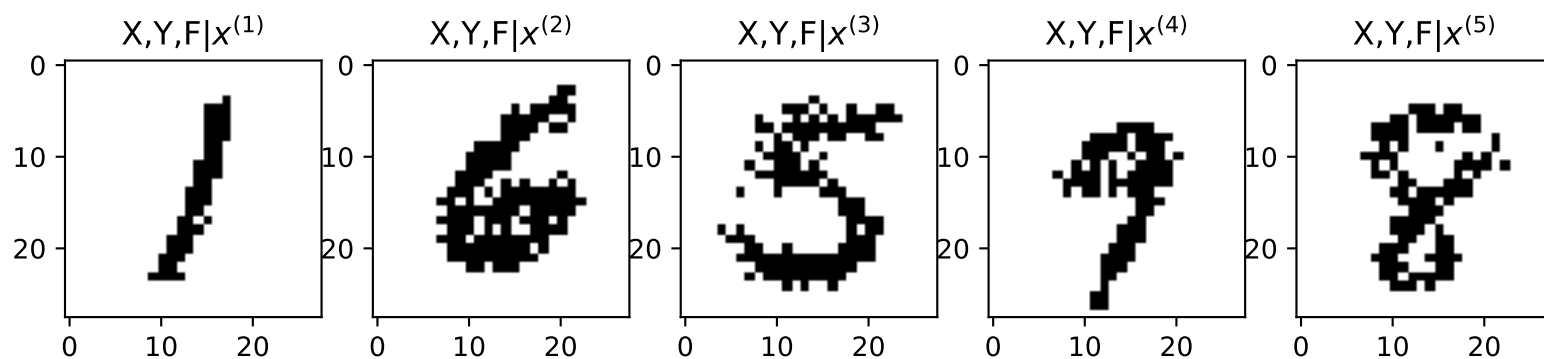

Supplement: supplementary_material [file attachment]

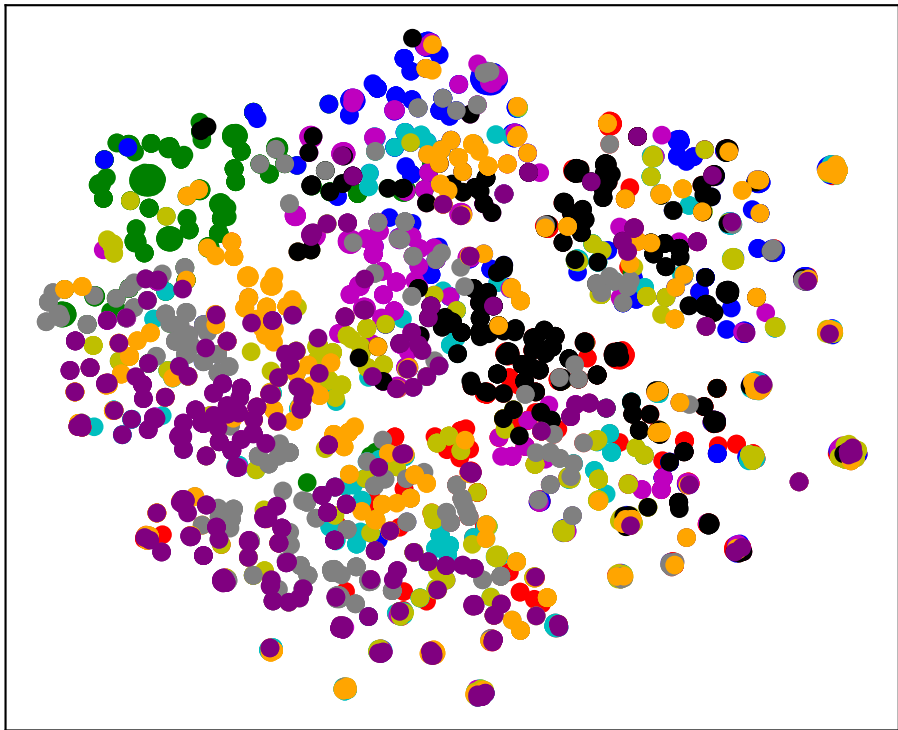

Supplement: supplementary_material [file attachment]

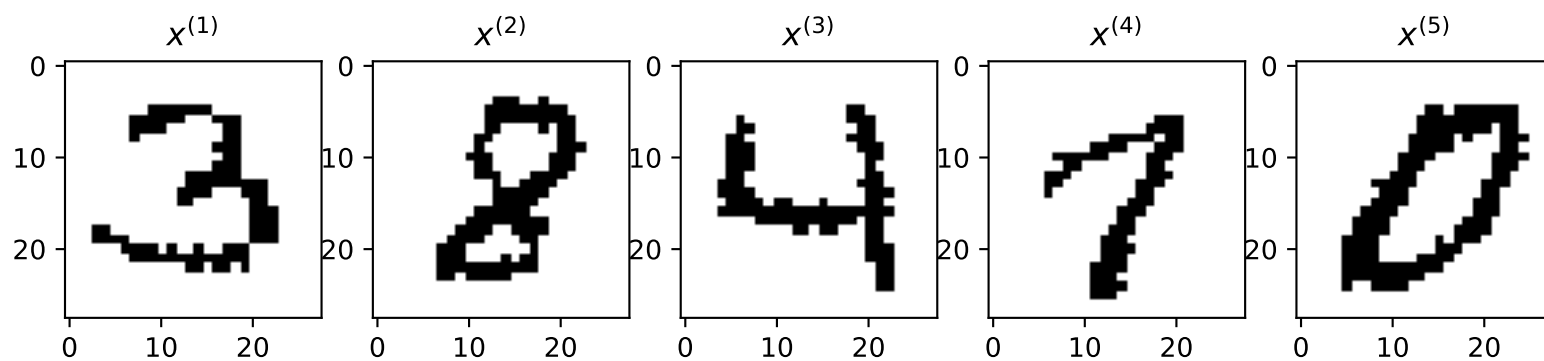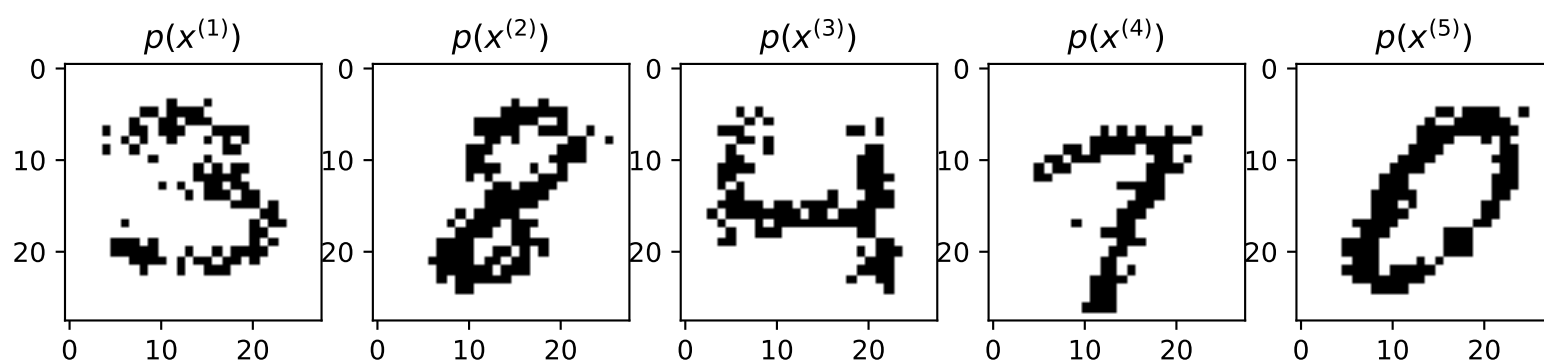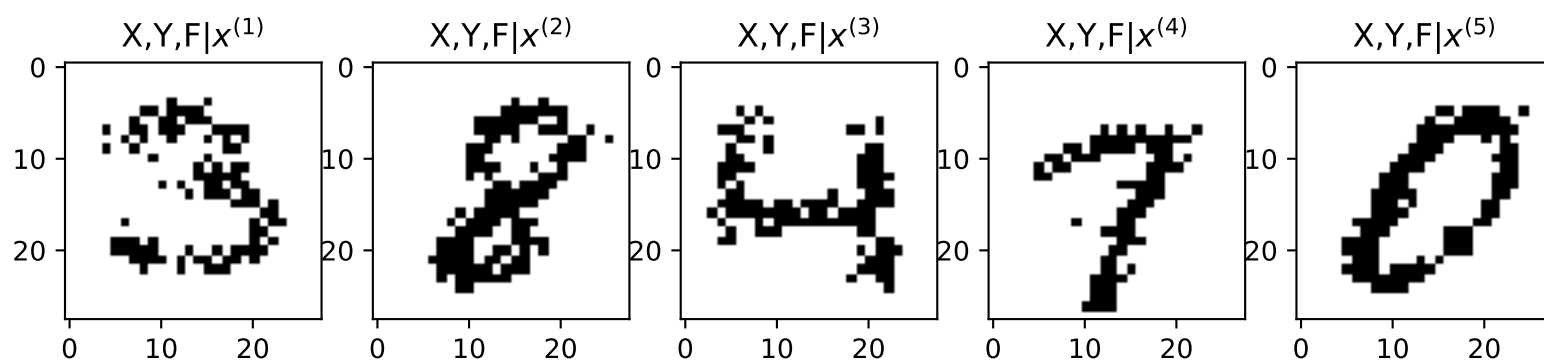

Supplement: supplementary_material [file attachment]

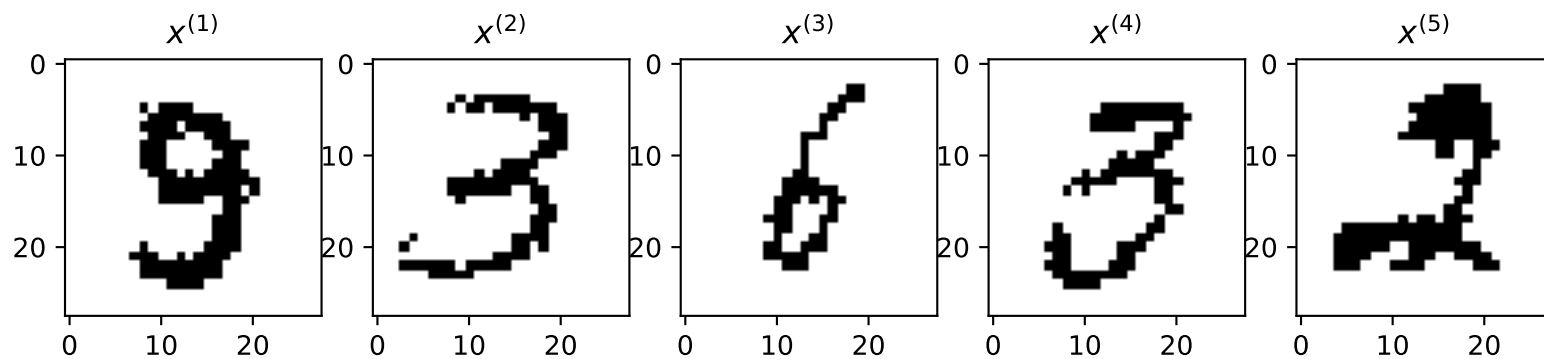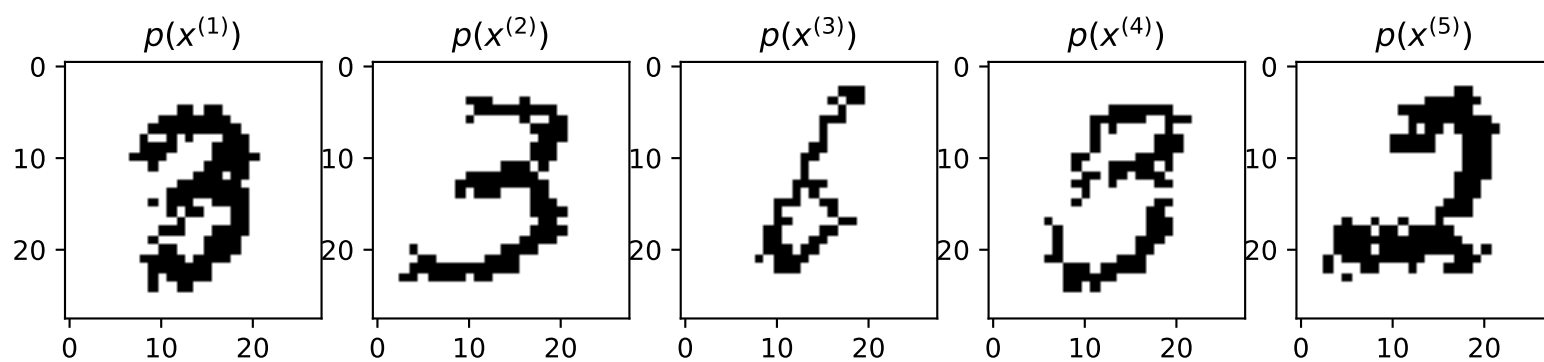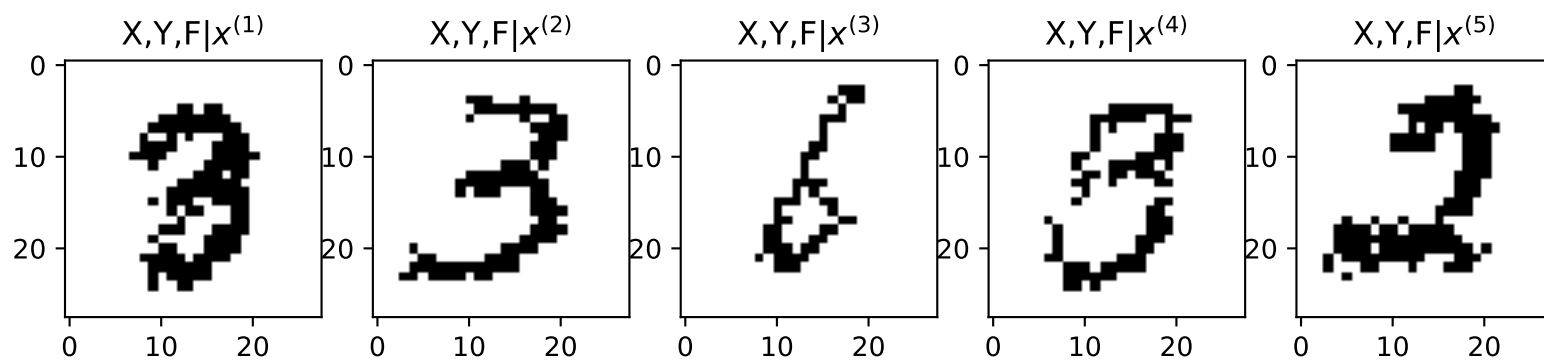

Supplement: supplementary_material [file attachment]

|   |                                                                                     |                                                                                     |                                                                                     |                                                                                      |                                                                                       |                                                                                       |                                                                                       |                                                                                       |                                                                                       |
|---|-------------------------------------------------------------------------------------|-------------------------------------------------------------------------------------|-------------------------------------------------------------------------------------|--------------------------------------------------------------------------------------|---------------------------------------------------------------------------------------|---------------------------------------------------------------------------------------|---------------------------------------------------------------------------------------|---------------------------------------------------------------------------------------|---------------------------------------------------------------------------------------|
| 0 |     |     |     |     |     |     |     |     |     |
| 1 |    |    |    |    |    |    |    |    |    |
| 2 |    |    |    |    |    |    |    |    |    |
| 3 |    |    |    |    |    |    |    |    |    |
| 4 |    |    |    |    |    |    |    |    |    |
| 5 |    |    |    |    |    |    |    |    |    |
| 6 |   |   |   |   |   |   |   |   |   |
| 7 |  |  |  |  |  |  |  |  |  |
| 8 |  |  |  |  |  |  |  |  |  |
| 9 |  |  |  |  |  |  |  |  |  |

Supplement: supplementary_material [file attachment]

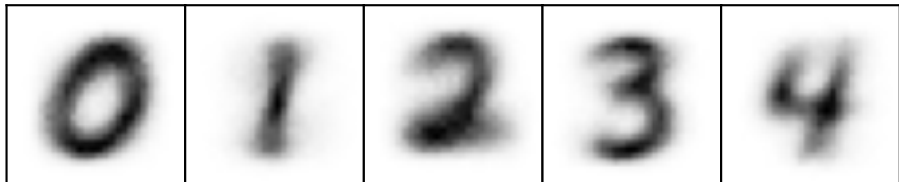

(0) 7.54

(1) 15.10

(2) 9.64

(3) 9.88

(4) 11.66

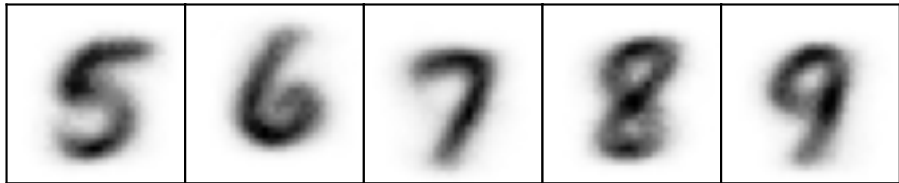

(5) 9.46

(6) 10.74

(7) 13.68

(8) 4.44

(9) 7.86

Supplement: supplementary_material [file attachment]

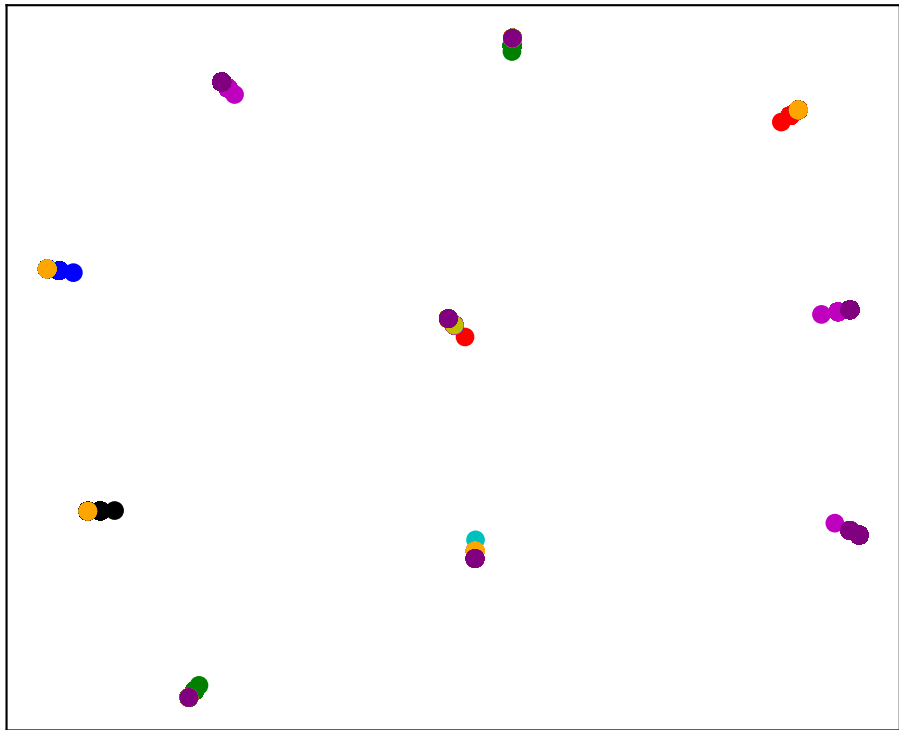

Supplement: supplementary_material [file attachment]
